# Supplementary material for: Systematic Dissection of Roles for Chromatin Regulators in a Yeast Stress Response
Source: PLoS Biol. 2012 Jul 31;10(7):e1001369. doi: 10.1371/journal.pbio.1001369 (PMC3416867; doi:10.1371/journal.pbio.1001369)
Supplement: Table S2 — Correlation matrix between mutant effects on gene expression. Data for Figure 3A. (XLSX) [file pbio.1001369.s009.xlsx]

## Sheet: Mutant_correlations
NAME	H3K9Q	H4K5,8,12,16R	H3K64Q	H4K77R	H4K79R	H4K5,8,12,16Q	H3K14Q	H3K121Q	H4K8Q	H3S86A	H4K31Q	H3K125R	H3K64R	H4K77Q	H4K91R	H3K18Q	H3K42Q	H3K4Q	H4K44R	H3K27Q	H3S28A	H3R2K	H4[del 9-24]	H3K79Q	H3S22D	H3S10D	H3D1-16	H3K115R	H3K23R	H3K56R	H3K37R	H3K27R	H4K59R	H4K20R	H4K31R	H4K8R	H3K23Q	H3S57A	H3T32A	H3S31A	H4K20Q	H4K59Q	H3K27A	H3R17K	H3K9A	H3S28D	H3R26K	H3R8K	H3R40K
H3K9Q	1	0.8652	0.8441	0.8934	0.809	0.6948	0.816	0.161	0.2254	0.3051	0.3796	0.2713	0.363	0.5574	0.3615	0.5111	0.638	0.4837	0.2839	0.4178	0.5302	0.5287	0.2015	0.3706	0.2916	0.2801	-0.3679	-0.3364	-0.3011	-0.5068	-0.1677	0.0412	-0.1069	0.1295	-0.1124	0.0343	-0.0875	-0.0704	0.038	0.1083	-0.0799	-0.1004	-0.0931	0.0129	-0.284	-0.196	0.1972	-0.0694	0.2381
H4K5,8,12,16R	0.8652	1	0.8223	0.82	0.8048	0.68	0.7252	0.0267	0.191	0.1503	0.2755	0.2916	0.3672	0.5425	0.4394	0.4684	0.6123	0.4297	0.1927	0.3294	0.4157	0.5736	0.1224	0.3837	0.3309	0.2958	-0.287	-0.2294	-0.2068	-0.3827	-0.0631	0.1402	0.0459	0.232	0.1479	0.1458	-0.239	-0.0881	-0.087	0.0721	-0.1367	-0.1132	-0.2032	-0.0481	-0.2535	-0.2368	0.0757	-0.1058	0.1957
H3K64Q	0.8441	0.8223	1	0.8863	0.8451	0.772	0.673	0.2747	0.3004	0.3293	0.3463	0.387	0.4631	0.5031	0.4282	0.4494	0.7959	0.485	0.3527	0.3367	0.4404	0.6025	0.1923	0.1581	0.1629	0.0804	-0.3151	-0.2217	-0.2303	-0.4076	-0.0629	-0.0565	-0.1027	0.1475	-0.0826	0.1204	-0.0997	0.0034	0.1128	0.0415	-0.0213	0.0472	-0.3148	-0.1083	-0.3434	-0.3536	0.0229	-0.1399	0.1055
H4K77R	0.8934	0.82	0.8863	1	0.87	0.7653	0.7356	0.3337	0.3075	0.3843	0.494	0.3967	0.4824	0.4702	0.3506	0.4789	0.7053	0.5446	0.3999	0.3605	0.4919	0.5298	0.2171	0.3028	0.2061	0.0897	-0.3744	-0.2401	-0.2583	-0.4495	-0.0256	-0.0311	-0.0117	0.0981	-0.198	0.0624	0.0318	0.0169	0.1776	0.1013	0.0781	0.0453	-0.2254	-0.0338	-0.3173	-0.3018	0.0878	-0.1531	0.1784
H4K79R	0.809	0.8048	0.8451	0.87	1	0.7987	0.6381	0.287	0.3063	0.145	0.326	0.3983	0.444	0.3818	0.3067	0.3764	0.6081	0.4473	0.2426	0.4282	0.4622	0.6278	0.2884	0.3164	0.2019	0.1433	-0.2597	-0.1318	-0.1686	-0.3065	0.0682	0.0992	0.0739	0.26	0.0528	0.3001	0.0234	-0.0155	0.1028	0.0777	0.2439	0.035	-0.3334	-0.1603	-0.2613	-0.2747	0.1013	-0.1857	0.0539
H4K5,8,12,16Q	0.6948	0.68	0.772	0.7653	0.7987	1	0.6016	0.3532	0.3798	0.2419	0.2978	0.4935	0.4501	0.3635	0.5227	0.5096	0.6738	0.5158	0.3632	0.3798	0.4731	0.5674	0.2701	0.2297	0.1395	0.0404	-0.2421	-0.1724	-0.0648	-0.1489	-0.0031	0.0662	0.1537	0.2252	0.0342	0.3373	-0.1464	-0.1299	-0.0218	-0.0732	0.0953	0.0782	-0.4082	-0.265	-0.4524	-0.4484	-0.1821	-0.3229	-0.0885
H3K14Q	0.816	0.7252	0.673	0.7356	0.6381	0.6016	1	0.1021	0.1778	0.2797	0.2892	0.1634	0.2506	0.4519	0.2746	0.5778	0.5689	0.5074	0.1983	0.3382	0.4254	0.4458	0.1501	0.307	0.2389	0.2874	-0.2572	-0.4244	-0.342	-0.5333	-0.1959	0.0217	-0.179	-0.0685	-0.1601	0.015	-0.0725	-0.1276	-0.0021	-0.0085	-0.1455	-0.1239	0.0613	0.2861	-0.3098	-0.1413	0.1314	-0.0376	0.0663
H3K121Q	0.161	0.0267	0.2747	0.3337	0.287	0.3532	0.1021	1	0.4184	0.5944	0.4142	0.426	0.2275	0.2054	0.0599	0.1961	0.2467	0.2504	0.4173	0.373	0.5256	0.3157	0.2717	0.0882	0.1204	-0.1236	-0.2016	-0.0667	-0.0523	-0.1151	-0.0079	-0.1092	0.0917	0.001	-0.3345	-0.0841	0.1968	0.2863	0.4478	0.2217	0.3365	0.3129	-0.0988	-0.1102	-0.2433	-0.125	-0.0987	-0.2391	-0.1137
H4K8Q	0.2254	0.191	0.3004	0.3075	0.3063	0.3798	0.1778	0.4184	1	0.3688	0.2221	0.3821	0.2379	0.1932	0.1745	0.2546	0.253	0.1659	0.2604	0.2017	0.2611	0.257	0.3233	-0.0785	-0.0299	-0.0525	-0.2308	-0.1182	-0.0462	-0.0968	-0.0198	-0.1255	0.0572	-0.0226	-0.1534	0.1617	-0.0425	0.1388	0.2104	0.0666	0.1999	0.3755	-0.1645	-0.183	-0.247	-0.1005	-0.1911	-0.1993	-0.1463
H3S86A	0.3051	0.1503	0.3293	0.3843	0.145	0.2419	0.2797	0.5944	0.3688	1	0.5303	0.3449	0.2313	0.3749	0.1938	0.2384	0.301	0.278	0.3921	0.2077	0.4084	0.1425	0.1844	0.0133	0.0498	-0.1738	-0.3131	-0.1833	-0.2375	-0.352	-0.1676	-0.2657	-0.1467	-0.1789	-0.4998	-0.3384	0.0092	0.1983	0.4056	0.175	-0.0587	0.192	0.1243	0.0857	-0.3659	-0.1616	-0.054	-0.0352	0.0797
H4K31Q	0.3796	0.2755	0.3463	0.494	0.326	0.2978	0.2892	0.4142	0.2221	0.5303	1	0.301	0.3748	0.2149	0.2367	0.1879	0.2493	0.2204	0.2561	0.1952	0.341	0.1196	0.0635	0.1477	0.0697	-0.0871	-0.2263	0.0509	-0.1085	-0.2456	0.1741	-0.0508	0.0827	-0.0856	-0.3473	-0.2238	0.1555	0.1298	0.3001	0.1629	0.2426	0.1741	0.0742	0.0855	-0.1882	-0.1272	-0.0082	-0.1731	0.1322
H3K125R	0.2713	0.2916	0.387	0.3967	0.3983	0.4935	0.1634	0.426	0.3821	0.3449	0.301	1	0.6258	0.3072	0.4241	0.1943	0.2249	0.1923	0.2066	0.3578	0.3315	0.3413	0.3729	0.1144	0.0012	-0.1521	-0.099	0.0671	0.0412	0.0952	0.2206	0.0837	0.2512	0.312	-0.1151	-0.0079	-0.035	0.0979	0.2563	0.0815	0.0907	0.1775	-0.3724	-0.1106	-0.4314	-0.3564	-0.0684	-0.0997	-0.1402
H3K64R	0.363	0.3672	0.4631	0.4824	0.444	0.4501	0.2506	0.2275	0.2379	0.2313	0.3748	0.6258	1	0.3444	0.495	0.0492	0.208	0.1359	0.0949	0.3126	0.2395	0.2579	0.1779	0.0273	-0.1306	-0.1152	0.0701	0.1908	0.0965	-0.0108	0.3991	0.1522	0.1491	0.3352	-0.1922	-0.163	-0.0011	0.0234	0.3175	0.084	-0.0063	0.1049	-0.3073	0.0468	-0.3277	-0.2451	0.0467	-0.0634	-0.0796
H4K77Q	0.5574	0.5425	0.5031	0.4702	0.3818	0.3635	0.4519	0.2054	0.1932	0.3749	0.2149	0.3072	0.3444	1	0.5162	0.3385	0.3254	0.2515	0.1638	0.3573	0.6206	0.4725	0.192	0.3303	0.4434	0.2063	-0.437	-0.343	-0.3196	-0.3051	-0.2936	-0.0214	-0.1305	0.1141	-0.1263	-0.2822	-0.2953	0.0481	0.096	0.2244	-0.2624	0.0005	-0.0097	0.0873	-0.1841	-0.0846	0.2577	0.1349	0.3505
H4K91R	0.3615	0.4394	0.4282	0.3506	0.3067	0.5227	0.2746	0.0599	0.1745	0.1938	0.2367	0.4241	0.495	0.5162	1	0.223	0.3314	0.3336	0.1772	0.1228	0.3227	0.3628	0.0982	0.0285	0.0721	0.0061	-0.2242	-0.1187	-0.1232	-0.1177	0.0078	-0.0034	0.0435	0.1778	0.0296	-0.0937	-0.3461	-0.0944	-0.002	0.0597	-0.1879	0.0608	-0.2462	-0.1401	-0.3384	-0.3095	-0.132	-0.1183	0.1181
H3K18Q	0.5111	0.4684	0.4494	0.4789	0.3764	0.5096	0.5778	0.1961	0.2546	0.2384	0.1879	0.1943	0.0492	0.3385	0.223	1	0.5545	0.3609	0.2701	0.3037	0.3995	0.3967	0.2011	0.2886	0.3213	0.1626	-0.2799	-0.4272	-0.2595	-0.2736	-0.2738	-0.048	-0.0224	-0.0412	-0.0118	0.1085	-0.2579	-0.0266	-0.1651	-0.1753	-0.1339	0.0221	-0.0305	0.0153	-0.3345	-0.196	-0.0447	-0.1018	0.001
H3K42Q	0.638	0.6123	0.7959	0.7053	0.6081	0.6738	0.5689	0.2467	0.253	0.301	0.2493	0.2249	0.208	0.3254	0.3314	0.5545	1	0.5934	0.5989	0.0662	0.2369	0.4493	-0.0072	-0.0058	0.1214	-0.0338	-0.3867	-0.2881	-0.2455	-0.339	-0.1812	-0.22	-0.1918	-0.1146	-0.1166	0.1573	-0.2066	0.0265	-0.0588	-0.1089	0.0056	0.1668	-0.319	-0.2087	-0.3425	-0.3962	-0.2112	-0.2512	0.1224
H3K4Q	0.4837	0.4297	0.485	0.5446	0.4473	0.5158	0.5074	0.2504	0.1659	0.278	0.2204	0.1923	0.1359	0.2515	0.3336	0.3609	0.5934	1	0.5453	0.0614	0.2412	0.4884	0.0286	0.1158	0.0529	0.0367	-0.3355	-0.3135	-0.1958	-0.3985	-0.112	-0.1975	-0.2086	-0.1577	-0.1842	-0.0417	-0.0643	-0.0647	0.0369	-0.0711	0.0424	0.0655	-0.2802	-0.1322	-0.4039	-0.3572	-0.1977	-0.2367	0.0106
H4K44R	0.2839	0.1927	0.3527	0.3999	0.2426	0.3632	0.1983	0.4173	0.2604	0.3921	0.2561	0.2066	0.0949	0.1638	0.1772	0.2701	0.5989	0.5453	1	0.024	0.2192	0.2591	-0.0407	-0.0147	0.0227	-0.1493	-0.3339	-0.2371	-0.1827	-0.2423	-0.1554	-0.2555	-0.1179	-0.201	-0.2848	-0.0807	0.033	0.2422	0.0734	-0.0308	0.1407	0.3097	-0.2141	-0.2795	-0.2778	-0.1694	-0.19	-0.2973	0.226
H3K27Q	0.4178	0.3294	0.3367	0.3605	0.4282	0.3798	0.3382	0.373	0.2017	0.2077	0.1952	0.3578	0.3126	0.3573	0.1228	0.3037	0.0662	0.0614	0.024	1	0.6615	0.5358	0.5645	0.4767	0.3395	0.336	0.0623	-0.2105	0.0304	-0.115	-0.043	0.2284	0.1972	0.4474	0.0563	0.0566	0.0884	0.0491	0.1241	0.0562	-0.086	-0.0892	-0.1343	0.0507	-0.184	-0.0346	0.2696	0.043	-0.0216
H3S28A	0.5302	0.4157	0.4404	0.4919	0.4622	0.4731	0.4254	0.5256	0.2611	0.4084	0.341	0.3315	0.2395	0.6206	0.3227	0.3995	0.2369	0.2412	0.2192	0.6615	1	0.5439	0.3786	0.4396	0.4271	0.2981	-0.3096	-0.3296	-0.2067	-0.2823	-0.2225	0.1221	0.063	0.2121	-0.0905	-0.1076	-0.0359	0.0489	0.1671	0.2422	-0.0252	0.0449	-0.015	-0.0341	-0.1988	-0.0121	0.2089	-0.0787	0.0955
H3R2K	0.5287	0.5736	0.6025	0.5298	0.6278	0.5674	0.4458	0.3157	0.257	0.1425	0.1196	0.3413	0.2579	0.4725	0.3628	0.3967	0.4493	0.4884	0.2591	0.5358	0.5439	1	0.3499	0.3736	0.3933	0.397	-0.2032	-0.2888	-0.0927	-0.1963	-0.1074	0.1762	0.0342	0.2402	0.1551	0.1544	-0.1668	-0.0201	-0.0558	-0.054	-0.054	-0.041	-0.3363	-0.0686	-0.3045	-0.276	0.0773	-0.0468	0.0104
H4[del 9-24]	0.2015	0.1224	0.1923	0.2171	0.2884	0.2701	0.1501	0.2717	0.3233	0.1844	0.0635	0.3729	0.1779	0.192	0.0982	0.2011	-0.0072	0.0286	-0.0407	0.5645	0.3786	0.3499	1	0.3196	0.1388	0.0201	-0.07	-0.3705	-0.1239	-0.1181	-0.1782	-0.1127	0.001	0.1954	-0.0851	0.2122	0.2399	0.1928	0.2601	-0.0642	0.0609	0.0423	-0.1304	0.1347	-0.0931	0.0215	0.3327	0.2187	0.0545
H3K79Q	0.3706	0.3837	0.1581	0.3028	0.3164	0.2297	0.307	0.0882	-0.0785	0.0133	0.1477	0.1144	0.0273	0.3303	0.0285	0.2886	-0.0058	0.1158	-0.0147	0.4767	0.4396	0.3736	0.3196	1	0.566	0.3274	-0.143	-0.2526	-0.1113	-0.1092	-0.1393	0.2503	0.1956	0.2519	0.1956	0.1258	0.0029	-0.0017	-0.0442	0.0472	-0.0729	-0.2547	0.001	0.1188	0.0665	0.0833	0.3485	0.1833	0.2528
H3S22D	0.2916	0.3309	0.1629	0.2061	0.2019	0.1395	0.2389	0.1204	-0.0299	0.0498	0.0697	0.0012	-0.1306	0.4434	0.0721	0.3213	0.1214	0.0529	0.0227	0.3395	0.4271	0.3933	0.1388	0.566	1	0.4229	-0.3575	-0.3307	-0.1817	-0.0398	-0.3153	0.157	0.1143	-0.0133	0.2113	0.0307	-0.2799	-0.0818	-0.1294	0.0408	-0.1193	-0.2295	0.016	0.0449	0.1644	-0.0455	0.2262	0.1953	0.3453
H3S10D	0.2801	0.2958	0.0804	0.0897	0.1433	0.0404	0.2874	-0.1236	-0.0525	-0.1738	-0.0871	-0.1521	-0.1152	0.2063	0.0061	0.1626	-0.0338	0.0367	-0.1493	0.336	0.2981	0.397	0.0201	0.3274	0.4229	1	-0.0009	-0.2058	0.0718	-0.0994	-0.1635	0.3796	0.0657	0.1852	0.2775	0.0072	-0.1746	-0.2191	-0.2418	0.0575	-0.1955	-0.2473	0.1196	0.1368	0.15	0.0575	0.1902	0.084	0.0277
H3D1-16	-0.3679	-0.287	-0.3151	-0.3744	-0.2597	-0.2421	-0.2572	-0.2016	-0.2308	-0.3131	-0.2263	-0.099	0.0701	-0.437	-0.2242	-0.2799	-0.3867	-0.3355	-0.3339	0.0623	-0.3096	-0.2032	-0.07	-0.143	-0.3575	-0.0009	1	0.3733	0.4861	0.2936	0.511	0.3955	0.2183	0.3011	0.2411	0.0618	0.163	-0.111	-0.1046	-0.1145	-0.0848	-0.1395	0.0187	0.0849	0.0854	0.1155	-0.0797	-0.1026	-0.4025
H3K115R	-0.3364	-0.2294	-0.2217	-0.2401	-0.1318	-0.1724	-0.4244	-0.0667	-0.1182	-0.1833	0.0509	0.0671	0.1908	-0.343	-0.1187	-0.4272	-0.2881	-0.3135	-0.2371	-0.2105	-0.3296	-0.2888	-0.3705	-0.2526	-0.3307	-0.2058	0.3733	1	0.4522	0.4408	0.5521	0.2854	0.3368	0.3046	0.1946	0.0587	0.0903	-0.08	-0.0367	0.0464	0.1865	-0.0009	-0.1106	-0.1682	0.0526	-0.0845	-0.1732	-0.1824	-0.2552
H3K23R	-0.3011	-0.2068	-0.2303	-0.2583	-0.1686	-0.0648	-0.342	-0.0523	-0.0462	-0.2375	-0.1085	0.0412	0.0965	-0.3196	-0.1232	-0.2595	-0.2455	-0.1958	-0.1827	0.0304	-0.2067	-0.0927	-0.1239	-0.1113	-0.1817	0.0718	0.4861	0.4522	1	0.5418	0.4236	0.4835	0.3519	0.317	0.2931	0.1322	-0.017	-0.2001	-0.1849	-0.1312	-0.0217	-0.027	-0.2822	-0.1462	-0.0642	-0.1908	-0.285	-0.2415	-0.375
H3K56R	-0.5068	-0.3827	-0.4076	-0.4495	-0.3065	-0.1489	-0.5333	-0.1151	-0.0968	-0.352	-0.2456	0.0952	-0.0108	-0.3051	-0.1177	-0.2736	-0.339	-0.3985	-0.2423	-0.115	-0.2823	-0.1963	-0.1181	-0.1092	-0.0398	-0.0994	0.2936	0.4408	0.5418	1	0.2957	0.3224	0.4994	0.2563	0.3936	0.2671	-0.1516	-0.2254	-0.3154	-0.1922	0.0272	0.0167	-0.3627	-0.2601	0.03	-0.21	-0.2709	-0.1548	-0.2851
H3K37R	-0.1677	-0.0631	-0.0629	-0.0256	0.0682	-0.0031	-0.1959	-0.0079	-0.0198	-0.1676	0.1741	0.2206	0.3991	-0.2936	0.0078	-0.2738	-0.1812	-0.112	-0.1554	-0.043	-0.2225	-0.1074	-0.1782	-0.1393	-0.3153	-0.1635	0.511	0.5521	0.4236	0.2957	1	0.3136	0.3307	0.2819	0.106	0.0143	0.1516	-0.0942	0.0359	-0.0162	0.2427	0.1643	-0.2539	-0.0037	-0.0155	-0.1044	-0.1209	-0.2292	-0.3212
H3K27R	0.0412	0.1402	-0.0565	-0.0311	0.0992	0.0662	0.0217	-0.1092	-0.1255	-0.2657	-0.0508	0.0837	0.1522	-0.0214	-0.0034	-0.048	-0.22	-0.1975	-0.2555	0.2284	0.1221	0.1762	-0.1127	0.2503	0.157	0.3796	0.3955	0.2854	0.4835	0.3224	0.3136	1	0.3661	0.3875	0.3832	0.0077	-0.1282	-0.263	-0.265	0.0071	-0.0914	-0.2475	0.0009	0.0152	-0.0211	-0.0174	-0.0598	-0.1314	-0.2102
H4K59R	-0.1069	0.0459	-0.1027	-0.0117	0.0739	0.1537	-0.179	0.0917	0.0572	-0.1467	0.0827	0.2512	0.1491	-0.1305	0.0435	-0.0224	-0.1918	-0.2086	-0.1179	0.1972	0.063	0.0342	0.001	0.1956	0.1143	0.0657	0.2183	0.3368	0.3519	0.4994	0.3307	0.3661	1	0.4511	0.362	0.2092	-0.1501	-0.1994	-0.2233	0.012	0.0513	-0.041	-0.2478	-0.2587	-0.0982	-0.1012	-0.1886	-0.2849	-0.1929
H4K20R	0.1295	0.232	0.1475	0.0981	0.26	0.2252	-0.0685	0.001	-0.0226	-0.1789	-0.0856	0.312	0.3352	0.1141	0.1778	-0.0412	-0.1146	-0.1577	-0.201	0.4474	0.2121	0.2402	0.1954	0.2519	-0.0133	0.1852	0.3011	0.3046	0.317	0.2563	0.2819	0.3875	0.4511	1	0.4302	0.2139	-0.0196	-0.1149	-0.1242	0.0995	-0.0715	-0.1366	-0.2646	-0.1899	-0.1486	-0.0724	0.1186	-0.0769	-0.0974
H4K31R	-0.1124	0.1479	-0.0826	-0.198	0.0528	0.0342	-0.1601	-0.3345	-0.1534	-0.4998	-0.3473	-0.1151	-0.1922	-0.1263	0.0296	-0.0118	-0.1166	-0.1842	-0.2848	0.0563	-0.0905	0.1551	-0.0851	0.1956	0.2113	0.2775	0.2411	0.1946	0.2931	0.3936	0.106	0.3832	0.362	0.4302	1	0.5278	-0.2479	-0.2609	-0.5147	-0.1867	-0.1023	-0.2453	-0.2249	-0.3364	0.0799	-0.0396	-0.1588	-0.1433	-0.1285
H4K8R	0.0343	0.1458	0.1204	0.0624	0.3001	0.3373	0.015	-0.0841	0.1617	-0.3384	-0.2238	-0.0079	-0.163	-0.2822	-0.0937	0.1085	0.1573	-0.0417	-0.0807	0.0566	-0.1076	0.1544	0.2122	0.1258	0.0307	0.0072	0.0618	0.0587	0.1322	0.2671	0.0143	0.0077	0.2092	0.2139	0.5278	1	0.0272	-0.1593	-0.2587	-0.2316	0.2239	-0.0234	-0.3222	-0.3189	0.023	-0.1301	-0.1607	-0.1457	-0.1848
H3K23Q	-0.0875	-0.239	-0.0997	0.0318	0.0234	-0.1464	-0.0725	0.1968	-0.0425	0.0092	0.1555	-0.035	-0.0011	-0.2953	-0.3461	-0.2579	-0.2066	-0.0643	0.033	0.0884	-0.0359	-0.1668	0.2399	0.0029	-0.2799	-0.1746	0.163	0.0903	-0.017	-0.1516	0.1516	-0.1282	-0.1501	-0.0196	-0.2479	0.0272	1	0.2282	0.4019	0.0831	0.3819	0.1297	0.1592	0.2059	0.2269	0.2381	0.3092	0.1008	0.0285
H3S57A	-0.0704	-0.0881	0.0034	0.0169	-0.0155	-0.1299	-0.1276	0.2863	0.1388	0.1983	0.1298	0.0979	0.0234	0.0481	-0.0944	-0.0266	0.0265	-0.0647	0.2422	0.0491	0.0489	-0.0201	0.1928	-0.0017	-0.0818	-0.2191	-0.111	-0.08	-0.2001	-0.2254	-0.0942	-0.263	-0.1994	-0.1149	-0.2609	-0.1593	0.2282	1	0.4807	0.1153	0.2497	0.1824	0.1992	0.0531	0.1317	0.3439	0.1969	0.1758	0.2267
H3T32A	0.038	-0.087	0.1128	0.1776	0.1028	-0.0218	-0.0021	0.4478	0.2104	0.4056	0.3001	0.2563	0.3175	0.096	-0.002	-0.1651	-0.0588	0.0369	0.0734	0.1241	0.1671	-0.0558	0.2601	-0.0442	-0.1294	-0.2418	-0.1046	-0.0367	-0.1849	-0.3154	0.0359	-0.265	-0.2233	-0.1242	-0.5147	-0.2587	0.4019	0.4807	1	0.3309	0.3015	0.1657	0.1453	0.2034	0.0731	0.1054	0.2085	0.1912	0.0284
H3S31A	0.1083	0.0721	0.0415	0.1013	0.0777	-0.0732	-0.0085	0.2217	0.0666	0.175	0.1629	0.0815	0.084	0.2244	0.0597	-0.1753	-0.1089	-0.0711	-0.0308	0.0562	0.2422	-0.054	-0.0642	0.0472	0.0408	0.0575	-0.1145	0.0464	-0.1312	-0.1922	-0.0162	0.0071	0.012	0.0995	-0.1867	-0.2316	0.0831	0.1153	0.3309	1	0.1167	-0.011	0.261	-0.0384	0.1215	0.2339	0.136	-0.0016	0.0643
H4K20Q	-0.0799	-0.1367	-0.0213	0.0781	0.2439	0.0953	-0.1455	0.3365	0.1999	-0.0587	0.2426	0.0907	-0.0063	-0.2624	-0.1879	-0.1339	0.0056	0.0424	0.1407	-0.086	-0.0252	-0.054	0.0609	-0.0729	-0.1193	-0.1955	-0.0848	0.1865	-0.0217	0.0272	0.2427	-0.0914	0.0513	-0.0715	-0.1023	0.2239	0.3819	0.2497	0.3015	0.1167	1	0.337	-0.0481	-0.1874	0.1372	0.0258	-0.0108	-0.1423	-0.0737
H4K59Q	-0.1004	-0.1132	0.0472	0.0453	0.035	0.0782	-0.1239	0.3129	0.3755	0.192	0.1741	0.1775	0.1049	0.0005	0.0608	0.0221	0.1668	0.0655	0.3097	-0.0892	0.0449	-0.041	0.0423	-0.2547	-0.2295	-0.2473	-0.1395	-0.0009	-0.027	0.0167	0.1643	-0.2475	-0.041	-0.1366	-0.2453	-0.0234	0.1297	0.1824	0.1657	-0.011	0.337	1	-0.2189	-0.0841	-0.0613	-0.0791	-0.1426	-0.2156	-0.0275
H3K27A	-0.0931	-0.2032	-0.3148	-0.2254	-0.3334	-0.4082	0.0613	-0.0988	-0.1645	0.1243	0.0742	-0.3724	-0.3073	-0.0097	-0.2462	-0.0305	-0.319	-0.2802	-0.2141	-0.1343	-0.015	-0.3363	-0.1304	0.001	0.016	0.1196	0.0187	-0.1106	-0.2822	-0.3627	-0.2539	0.0009	-0.2478	-0.2646	-0.2249	-0.3222	0.1592	0.1992	0.1453	0.261	-0.0481	-0.2189	1	0.4076	0.2917	0.5881	0.2718	0.2859	0.1542
H3R17K	0.0129	-0.0481	-0.1083	-0.0338	-0.1603	-0.265	0.2861	-0.1102	-0.183	0.0857	0.0855	-0.1106	0.0468	0.0873	-0.1401	0.0153	-0.2087	-0.1322	-0.2795	0.0507	-0.0341	-0.0686	0.1347	0.1188	0.0449	0.1368	0.0849	-0.1682	-0.1462	-0.2601	-0.0037	0.0152	-0.2587	-0.1899	-0.3364	-0.3189	0.2059	0.0531	0.2034	-0.0384	-0.1874	-0.0841	0.4076	1	0.1561	0.1999	0.4395	0.4869	0.1376
H3K9A	-0.284	-0.2535	-0.3434	-0.3173	-0.2613	-0.4524	-0.3098	-0.2433	-0.247	-0.3659	-0.1882	-0.4314	-0.3277	-0.1841	-0.3384	-0.3345	-0.3425	-0.4039	-0.2778	-0.184	-0.1988	-0.3045	-0.0931	0.0665	0.1644	0.15	0.0854	0.0526	-0.0642	0.03	-0.0155	-0.0211	-0.0982	-0.1486	0.0799	0.023	0.2269	0.1317	0.0731	0.1215	0.1372	-0.0613	0.2917	0.1561	1	0.4175	0.2865	0.3293	0.2777
H3S28D	-0.196	-0.2368	-0.3536	-0.3018	-0.2747	-0.4484	-0.1413	-0.125	-0.1005	-0.1616	-0.1272	-0.3564	-0.2451	-0.0846	-0.3095	-0.196	-0.3962	-0.3572	-0.1694	-0.0346	-0.0121	-0.276	0.0215	0.0833	-0.0455	0.0575	0.1155	-0.0845	-0.1908	-0.21	-0.1044	-0.0174	-0.1012	-0.0724	-0.0396	-0.1301	0.2381	0.3439	0.1054	0.2339	0.0258	-0.0791	0.5881	0.1999	0.4175	1	0.356	0.2301	0.2017
H3R26K	0.1972	0.0757	0.0229	0.0878	0.1013	-0.1821	0.1314	-0.0987	-0.1911	-0.054	-0.0082	-0.0684	0.0467	0.2577	-0.132	-0.0447	-0.2112	-0.1977	-0.19	0.2696	0.2089	0.0773	0.3327	0.3485	0.2262	0.1902	-0.0797	-0.1732	-0.285	-0.2709	-0.1209	-0.0598	-0.1886	0.1186	-0.1588	-0.1607	0.3092	0.1969	0.2085	0.136	-0.0108	-0.1426	0.2718	0.4395	0.2865	0.356	1	0.5747	0.4556
H3R8K	-0.0694	-0.1058	-0.1399	-0.1531	-0.1857	-0.3229	-0.0376	-0.2391	-0.1993	-0.0352	-0.1731	-0.0997	-0.0634	0.1349	-0.1183	-0.1018	-0.2512	-0.2367	-0.2973	0.043	-0.0787	-0.0468	0.2187	0.1833	0.1953	0.084	-0.1026	-0.1824	-0.2415	-0.1548	-0.2292	-0.1314	-0.2849	-0.0769	-0.1433	-0.1457	0.1008	0.1758	0.1912	-0.0016	-0.1423	-0.2156	0.2859	0.4869	0.3293	0.2301	0.5747	1	0.3636
H3R40K	0.2381	0.1957	0.1055	0.1784	0.0539	-0.0885	0.0663	-0.1137	-0.1463	0.0797	0.1322	-0.1402	-0.0796	0.3505	0.1181	0.001	0.1224	0.0106	0.226	-0.0216	0.0955	0.0104	0.0545	0.2528	0.3453	0.0277	-0.4025	-0.2552	-0.375	-0.2851	-0.3212	-0.2102	-0.1929	-0.0974	-0.1285	-0.1848	0.0285	0.2267	0.0284	0.0643	-0.0737	-0.0275	0.1542	0.1376	0.2777	0.2017	0.4556	0.3636	1
H4K12Q	-0.1279	-0.1074	-0.2158	-0.1888	-0.2749	-0.3004	-0.0447	-0.3309	-0.2221	-0.0075	0.0516	-0.3801	-0.1435	0.064	0.0424	-0.1447	-0.167	-0.1973	-0.1912	-0.3184	-0.138	-0.3641	-0.3254	-0.1867	0.0051	-0.0616	-0.0675	0.0465	-0.1537	-0.1269	-0.0607	-0.0072	-0.1768	-0.2664	-0.0431	-0.2605	-0.137	-0.0488	-0.0352	0.1311	-0.1473	-0.0722	0.3681	0.1524	0.2127	0.2161	-0.0055	0.103	0.1907
H4K16R	-0.2031	-0.0503	-0.2436	-0.2944	-0.2581	-0.254	-0.1731	-0.5566	-0.2475	-0.3008	-0.1991	-0.3067	-0.0786	-0.0198	0.0744	-0.1513	-0.2675	-0.341	-0.411	-0.1937	-0.2245	-0.2783	-0.2332	-0.1025	-0.0308	0.0167	0.212	0.1601	0.1	0.1495	0.1143	0.175	0.1081	0.1176	0.3223	0.0473	-0.3231	-0.2366	-0.289	0.0157	-0.2955	-0.202	0.1184	0.0222	0.177	0.1094	-0.0469	0.0768	0.071
H4K16Q	0.2857	0.3015	0.114	0.1606	0.0714	-0.0199	0.2537	-0.2423	-0.0486	0.1282	0.1343	-0.1354	0.0643	0.4406	0.2095	0.0682	0.0055	-0.0365	-0.1242	-0.0036	0.1787	-0.0301	-0.0968	0.1519	0.284	0.1302	-0.2825	-0.1739	-0.2978	-0.3048	-0.2134	0.0432	-0.1458	-0.0904	-0.0538	-0.2442	-0.2426	-0.0211	0.0174	0.2371	-0.2029	-0.1803	0.2961	0.1654	0.1032	0.1305	0.2131	0.2423	0.3819
H3D1-20	0.0157	0.0232	-0.0622	-0.0622	-0.2357	-0.0789	0.3695	-0.2716	-0.1452	0.0589	-0.0879	-0.257	-0.224	-0.0194	0.0597	0.2213	0.1841	0.3375	0.0025	-0.3438	-0.2277	-0.1237	-0.3439	-0.2292	-0.055	0.0824	-0.0157	-0.2527	-0.0925	-0.2003	-0.1707	-0.0821	-0.2837	-0.4485	-0.1132	-0.2434	-0.2373	-0.2476	-0.2506	-0.2021	-0.3493	-0.1204	0.2165	0.2778	-0.173	-0.1351	-0.2675	-0.0625	-0.1217
H3K4,9,14,18R	0.0303	0.0269	-0.0267	-0.0767	-0.1774	-0.0711	0.3711	-0.3175	-0.1578	-0.0296	-0.1971	-0.3161	-0.2309	-0.0577	-0.0197	0.1605	0.152	0.0697	-0.191	-0.3133	-0.2767	-0.2273	-0.2762	-0.2115	-0.0676	0.0635	0.0834	-0.1546	-0.1042	-0.1968	-0.182	-0.0913	-0.2876	-0.3558	-0.0257	-0.0329	-0.1641	-0.2276	-0.1751	-0.1423	-0.3179	-0.1415	0.2777	0.2775	-0.0183	-0.0417	-0.1546	-0.0047	-0.1232
H3K9,14,18,23R	-0.166	-0.1879	-0.2393	-0.2459	-0.3673	-0.2467	0.2203	-0.2834	-0.1419	0.0197	-0.182	-0.2769	-0.2001	-0.0921	-0.069	0.0475	-0.071	-0.0499	-0.2479	-0.3124	-0.3105	-0.3288	-0.2459	-0.2625	-0.1265	-0.0052	0.1451	-0.0995	-0.0788	-0.1077	-0.1157	-0.0584	-0.2361	-0.3791	-0.1421	-0.1941	-0.1076	-0.1828	-0.1032	-0.1008	-0.3162	-0.1094	0.3658	0.3678	-0.0179	0.0406	-0.0931	0.0601	-0.1385
H3K9,14,18,23Q	-0.039	-0.0888	-0.1756	-0.131	-0.3015	-0.0748	0.3173	-0.0548	-0.1121	0.1662	0.0153	-0.1669	-0.2417	-0.0056	0.0279	0.282	0.0186	0.1811	0.0246	-0.1573	-0.0172	-0.1056	-0.2789	-0.0997	0.0207	0.1686	0.0149	-0.1798	-0.0088	-0.089	-0.1742	0.052	-0.0992	-0.3434	-0.1099	-0.2909	-0.1669	-0.2255	-0.2353	-0.1726	-0.3344	-0.0927	0.3157	0.293	-0.2495	-0.0754	-0.2206	-0.16	-0.1754
H3K122R	0.149	0.1116	0.2009	0.1913	0.0685	0.2841	0.1983	0.1868	0.2349	0.2411	0.1502	0.0783	-0.0904	0.0416	0.0935	0.7853	0.4242	0.2634	0.279	-0.0155	0.1123	0.142	-0.0028	-0.0626	0.0428	-0.0588	-0.1972	-0.18	-0.1101	-0.0735	-0.1887	-0.1562	-0.0294	-0.169	-0.0716	0.0724	-0.2192	-0.0162	-0.1772	-0.2198	-0.0338	0.1313	-0.0522	-0.1637	-0.312	-0.2455	-0.2614	-0.2244	-0.139
H3K37Q	0.0115	-0.0452	0.0291	0.1004	0.0296	0.2023	0.0214	0.288	0.146	0.1729	0.0884	0.0092	-0.1556	-0.1265	-0.0026	0.2232	0.3219	0.5325	0.6391	-0.1449	0.0256	0.1764	-0.1715	0.0959	-0.0302	-0.0828	-0.1087	-0.087	0.0704	-0.041	-0.0031	-0.089	0.0079	-0.2	-0.0813	0.0513	-0.0471	0.011	-0.0945	-0.157	0.1508	0.1881	-0.2418	-0.319	-0.328	-0.2189	-0.3566	-0.414	-0.0969
H3K56Q	0.2047	0.1837	0.098	0.2142	0.027	0.1803	0.2552	-0.0009	-0.0175	0.12	0.1256	-0.0731	-0.11	0.0975	0.0841	0.3371	0.3644	0.4534	0.5043	-0.173	0.0485	0.0254	-0.2782	0.1747	0.1541	0.0791	-0.2476	-0.2066	-0.0225	-0.0548	-0.1205	-0.0336	-0.0466	-0.2452	-0.0662	-0.0967	-0.2606	-0.1661	-0.2812	-0.1341	-0.1788	0.0671	-0.1048	-0.0973	-0.1995	-0.2041	-0.249	-0.26	0.1092
H4[del 4-28]	0.3432	0.3787	0.3944	0.3588	0.3834	0.4521	0.3531	-0.1735	0.2816	-0.0663	0.0045	-0.0415	-0.0094	-0.036	0.1874	0.3013	0.5267	0.2806	0.1985	-0.2668	-0.1588	0.0738	-0.0936	-0.1209	-0.0785	-0.0537	-0.2648	-0.1131	-0.1638	-0.1109	-0.0934	-0.194	-0.1501	-0.1806	0.1605	0.5348	-0.1795	-0.1737	-0.2212	-0.1805	0.1013	0.121	-0.2203	-0.2364	-0.1237	-0.2412	-0.2896	-0.1917	-0.0486
H3K18R	0.1642	0.2055	0.2671	0.2431	0.162	0.2415	0.2758	0.0238	0.0279	0.1627	0.1345	0.0557	0.1143	0.0083	0.2342	0.0771	0.4097	0.697	0.2688	-0.1575	-0.0952	0.1681	-0.2376	-0.3077	-0.1799	-0.0834	-0.0723	-0.0086	0.0382	-0.1735	0.074	-0.0935	-0.1742	-0.1925	-0.0991	-0.1158	-0.1019	-0.1928	-0.0383	-0.1047	-0.0549	0.0459	-0.2305	-0.093	-0.3514	-0.3893	-0.3714	-0.2439	-0.1789
H3K4A	0.1544	0.1428	0.2874	0.2452	0.1237	0.259	0.2536	0.1621	0.1202	0.24	0.0984	0.0517	-0.0146	0.0509	0.2378	0.1827	0.5054	0.7453	0.4671	-0.1797	-0.0109	0.223	-0.1155	-0.3343	-0.1221	-0.0988	-0.276	-0.2576	-0.1941	-0.2719	-0.1969	-0.3617	-0.3129	-0.3512	-0.1932	-0.0603	-0.0588	0.0141	0.0936	-0.0422	0.0483	0.0792	-0.1493	-0.1851	-0.2901	-0.3026	-0.3958	-0.215	-0.0984
H3S10A	-0.0111	-0.0311	0.0842	0.0176	-0.1344	0.0819	0.1381	0.0154	0.0254	0.1973	-0.0682	-0.0656	-0.1548	0.0411	0.1933	0.1709	0.3709	0.6025	0.3519	-0.2067	-0.1069	0.0943	-0.1235	-0.3723	-0.0777	-0.0937	-0.2724	-0.2912	-0.1758	-0.1793	-0.3212	-0.4383	-0.3178	-0.3806	-0.1792	-0.097	-0.2009	-0.0638	-0.0377	-0.1734	-0.155	0.0172	-0.1082	-0.1176	-0.2415	-0.2621	-0.3474	-0.0731	-0.0246
H3K115Q	-0.47	-0.47	-0.3292	-0.4262	-0.5211	-0.3536	-0.4094	-0.2356	-0.0608	-0.0952	-0.2816	-0.25	-0.2476	-0.2878	-0.0801	-0.2438	-0.0137	-0.1471	0.082	-0.6636	-0.5549	-0.5172	-0.4458	-0.6436	-0.3749	-0.3405	-0.02	0.1703	0.0221	0.2361	-0.0531	-0.3581	-0.2678	-0.3662	-0.1201	-0.0569	-0.0976	0.0162	-0.1031	-0.0777	-0.0354	0.2386	0.0289	-0.1434	0.1452	-0.0237	-0.2974	-0.0016	-0.0149
H3S87A	-0.558	-0.6319	-0.4801	-0.467	-0.5634	-0.4683	-0.5036	0.0006	-0.0789	-0.0442	-0.2048	-0.1162	-0.2104	-0.3412	-0.3074	-0.3143	-0.2439	-0.2508	0.0103	-0.4339	-0.3814	-0.5255	-0.2622	-0.5166	-0.3769	-0.3089	0.1069	0.1965	0.1297	0.2397	0.1146	-0.2536	-0.1415	-0.2568	-0.2871	-0.1607	0.1839	0.1207	0.1098	0.0591	0.1349	0.3564	0.09	0.0011	0.1639	0.0729	-0.1042	0.0369	-0.1308
H3K36Q	-0.4901	-0.4046	-0.3482	-0.4776	-0.5023	-0.3547	-0.3711	-0.2941	-0.0677	-0.1981	-0.3916	-0.3535	-0.4184	-0.3194	-0.1276	-0.0976	-0.0294	-0.0115	0.129	-0.463	-0.4639	-0.2389	-0.2135	-0.3787	-0.2408	-0.2426	0.1197	-0.0359	0.0422	0.1401	-0.1115	-0.3056	-0.1816	-0.2535	0.1862	0.1271	-0.1134	0.027	-0.2215	-0.2729	-0.1149	0.0497	-0.0799	-0.2401	-0.0017	0.0433	-0.2958	-0.029	-0.0718
H3K36R	-0.4526	-0.321	-0.3581	-0.473	-0.4783	-0.3837	-0.3496	-0.3621	-0.0784	-0.2394	-0.395	-0.3224	-0.3753	-0.2591	-0.1031	-0.0693	-0.137	-0.0574	-0.0571	-0.3476	-0.4134	-0.1458	-0.1609	-0.2165	-0.0931	-0.0715	0.1734	-0.033	0.0886	0.1962	-0.081	-0.1274	-0.0795	-0.1619	0.3074	0.0901	-0.2167	-0.0645	-0.2613	-0.2876	-0.2176	-0.0442	-0.1116	-0.1969	0.0095	-0.0172	-0.2554	-0.0159	-0.0988
H3R49K	-0.4144	-0.4461	-0.292	-0.364	-0.4814	-0.3332	-0.3503	-0.0634	-0.0781	0.0184	-0.279	-0.277	-0.3612	-0.2048	-0.1189	-0.11	0.0866	0.0714	0.4046	-0.4428	-0.3807	-0.2739	-0.1737	-0.3751	-0.2	-0.3483	-0.0599	-0.112	-0.1327	0.0023	-0.2555	-0.5259	-0.321	-0.3502	-0.1451	-0.0239	0.0322	0.1991	-0.0236	-0.204	-0.029	0.1719	-0.0118	-0.1665	0.0753	0.0588	-0.1049	0.0572	0.224
H3K125Q	-0.2971	-0.4379	-0.2907	-0.1999	-0.2848	-0.3096	-0.3263	0.0365	-0.0251	0.1124	0.2052	-0.1974	-0.1575	-0.3244	-0.2028	-0.3386	-0.1451	-0.0809	0.0781	-0.497	-0.2992	-0.474	-0.3408	-0.4658	-0.3836	-0.3539	-0.0764	0.2715	-0.0183	0.06	0.1405	-0.2745	-0.0925	-0.3151	-0.3366	-0.1528	0.2547	-0.0044	0.122	0.1655	0.334	0.2404	0.2001	-0.1024	0.1185	0.0895	-0.0817	-0.1287	0.0024
H3P30A	-0.3202	-0.4226	-0.3051	-0.1865	-0.2112	-0.3343	-0.3076	0.1805	-0.1032	0.0056	-0.0124	-0.1903	-0.2623	-0.2824	-0.4184	-0.2788	-0.2163	-0.1242	0.0126	-0.2003	-0.1971	-0.2542	0.0976	0.0086	0.0539	-0.1727	-0.0237	-0.015	-0.1311	0.0192	-0.035	-0.2939	-0.0718	-0.3378	-0.2795	-0.0272	0.4123	0.2131	0.3334	0.0269	0.3324	0.0771	0.1467	0.1344	0.4648	0.2037	0.2026	0.229	0.2154
H3S135A	-0.3293	-0.4753	-0.3926	-0.3031	-0.2863	-0.394	-0.3449	-0.0048	-0.0844	-0.0726	0.0174	-0.1799	-0.2631	-0.2882	-0.2937	-0.3404	-0.3329	-0.226	-0.1181	-0.3009	-0.2005	-0.4237	-0.0585	-0.2699	-0.1963	-0.1646	-0.0472	0.0926	-0.1614	0.0053	0.0204	-0.286	-0.1222	-0.2704	-0.2212	-0.0522	0.3387	0.0912	0.2092	0.2216	0.4254	0.1217	0.3101	-0.0246	0.3436	0.2467	0.1837	0.1119	0.0737
H3K14A	-0.5252	-0.4946	-0.451	-0.521	-0.4148	-0.5361	-0.5287	-0.2307	-0.2751	-0.3112	-0.311	-0.3663	-0.3371	-0.3029	-0.3422	-0.4788	-0.3359	-0.3918	-0.2622	-0.3995	-0.4144	-0.4419	-0.1419	-0.1905	-0.1052	-0.2437	0.1113	0.2091	-0.0437	0.1126	-0.0148	-0.2378	-0.212	-0.1718	0.0149	0.0793	0.1997	0.2318	0.1332	0.069	0.239	0.0217	0.2204	0.0321	0.5502	0.3226	0.1823	0.3486	0.1831
H3S22A	-0.5391	-0.518	-0.4087	-0.4558	-0.31	-0.4637	-0.5496	-0.0894	-0.1329	-0.3117	-0.2921	-0.2395	-0.2466	-0.4579	-0.3813	-0.4926	-0.351	-0.3823	-0.2307	-0.3139	-0.42	-0.426	-0.043	-0.3039	-0.335	-0.3008	0.2464	0.2914	0.0472	0.1183	0.1285	-0.2014	-0.1503	-0.0378	-0.0094	0.1552	0.3765	0.3575	0.2844	0.1373	0.3524	0.1648	0.1474	-0.0353	0.4683	0.3454	0.0792	0.1733	-0.0146
H3S102A	-0.6369	-0.645	-0.6147	-0.6088	-0.6094	-0.6173	-0.5367	-0.2736	-0.2299	-0.2794	-0.2726	-0.352	-0.3016	-0.4428	-0.3546	-0.4571	-0.4522	-0.4532	-0.2846	-0.5232	-0.5742	-0.6667	-0.2047	-0.3735	-0.2405	-0.2952	0.142	0.1587	-0.0284	0.2327	0.0366	-0.3035	-0.1224	-0.3449	-0.1277	-0.0092	0.1954	0.0741	0.099	0.0337	0.1603	0.051	0.2607	0.1001	0.49	0.2925	0.053	0.2855	0.0506
H3S95A	-0.5063	-0.5035	-0.5274	-0.5439	-0.5255	-0.5027	-0.4047	-0.2299	-0.1689	-0.2171	-0.1942	-0.3434	-0.3675	-0.2161	-0.1816	-0.2654	-0.4294	-0.4274	-0.352	-0.2677	-0.3046	-0.4417	0.026	-0.113	0.0566	-0.1172	-0.0032	-0.1044	-0.1332	0.1091	-0.1661	-0.2352	-0.0891	-0.2985	-0.0169	0.0199	0.0442	0.1384	0.0513	0.0077	0.0387	0.0069	0.308	0.1721	0.4596	0.3827	0.0943	0.3248	0.1881
H4K5Q	-0.3869	-0.3203	-0.3896	-0.4679	-0.4182	-0.552	-0.3974	-0.3907	-0.2074	-0.2812	-0.3918	-0.3434	-0.3174	-0.1753	-0.2901	-0.408	-0.4108	-0.3906	-0.2785	-0.1944	-0.3574	-0.3561	0.0629	-0.1233	-0.1351	-0.1207	0.0683	0.0584	-0.0927	0.0945	-0.2289	-0.2262	-0.1853	-0.0366	0.122	0.0961	0.1904	0.1677	-0.0001	0.049	-0.1057	-0.1305	0.227	0.1152	0.3697	0.414	0.2626	0.4116	0.2465
H3K23A	-0.3735	-0.4113	-0.4959	-0.4664	-0.5804	-0.6485	-0.2314	-0.2946	-0.4096	-0.1724	-0.2388	-0.5141	-0.4564	-0.2126	-0.4003	-0.2632	-0.3517	-0.2757	-0.2161	-0.3471	-0.3387	-0.4293	-0.2657	-0.1116	0.0482	0.1132	0.1333	-0.0164	0.0397	-0.0487	-0.131	-0.065	-0.2287	-0.3366	-0.1412	-0.2822	0.1299	-0.0197	-0.0564	0.0018	-0.2152	-0.0692	0.4055	0.3876	0.4041	0.2841	0.1603	0.2363	0.1557
H3K79R	-0.1745	-0.2528	-0.2333	-0.2672	-0.3715	-0.2951	-0.2504	-0.1089	-0.1813	-0.0301	-0.2668	-0.3226	-0.3656	-0.0584	-0.1922	-0.1082	-0.0938	-0.1324	0.0912	-0.1532	-0.0964	-0.1679	-0.1053	-0.0499	0.1726	0.0557	-0.0377	-0.1166	-0.0043	0.0294	-0.2889	-0.1624	-0.1609	-0.2474	-0.0703	-0.0511	-0.0846	0.0178	-0.0405	-0.0382	-0.224	-0.0839	0.0974	-0.0493	0.3057	0.1185	0.0022	0.1115	0.2221
H3K121R	-0.6668	-0.5962	-0.6395	-0.701	-0.6863	-0.5578	-0.5962	-0.2898	-0.3212	-0.2711	-0.3408	-0.228	-0.2032	-0.4219	-0.2407	-0.4869	-0.5636	-0.519	-0.4098	-0.2565	-0.4596	-0.5178	-0.2274	-0.2922	-0.2782	-0.1418	0.4691	0.4063	0.3819	0.5448	0.1889	0.165	0.2221	0.0953	0.1504	-0.0697	0.0097	-0.1232	-0.179	-0.111	-0.2249	-0.0709	0.0534	0.0322	0.1677	0.1221	-0.1444	0.0425	-0.1672
H3L103A	-0.548	-0.3711	-0.4997	-0.6068	-0.5426	-0.4982	-0.4782	-0.4841	-0.2604	-0.3536	-0.3567	-0.1987	-0.1131	-0.2863	-0.1238	-0.4267	-0.4986	-0.4692	-0.5038	-0.2162	-0.4882	-0.4313	-0.0928	-0.2482	-0.3055	-0.179	0.4389	0.3443	0.2489	0.3648	0.1867	0.0141	0.1304	0.1827	0.2682	0.1117	-0.0393	-0.132	-0.1905	-0.0742	-0.2729	-0.1342	0.0869	0.0814	0.2002	0.1596	-0.0094	0.1716	-0.1167
H3K14R	-0.4553	-0.417	-0.5623	-0.5847	-0.6509	-0.438	-0.1263	-0.3678	-0.2876	-0.1947	-0.3569	-0.3586	-0.3745	-0.2428	-0.1996	-0.0875	-0.3874	-0.2785	-0.3945	-0.191	-0.3144	-0.3936	-0.2494	-0.1695	-0.0394	0.1062	0.3175	0.0318	0.2758	0.2854	-0.1263	0.1708	0.0341	-0.1435	0.148	-0.1018	-0.2053	-0.2827	-0.3402	-0.1953	-0.4646	-0.256	0.2742	0.2392	0.0234	0.0867	-0.1582	0.0714	-0.22
H3K4R	-0.5279	-0.5224	-0.5677	-0.5959	-0.5506	-0.2897	-0.3716	-0.1187	-0.2591	-0.2528	-0.304	-0.1717	-0.2422	-0.3976	-0.2477	-0.156	-0.429	-0.3979	-0.3508	0.0067	-0.221	-0.3352	-0.1285	-0.1385	-0.1211	0.0517	0.5343	0.25	0.5291	0.5568	0.1283	0.3465	0.33	0.1649	0.2697	0.0837	-0.083	-0.2721	-0.3147	-0.1978	-0.2081	-0.1453	0.0789	0.0008	0.0139	0.0344	-0.2349	-0.1225	-0.3852
H3K9R	-0.6975	-0.6415	-0.6548	-0.6944	-0.598	-0.373	-0.5823	-0.1842	-0.2258	-0.3781	-0.4259	-0.2948	-0.3984	-0.6073	-0.3399	-0.3213	-0.4353	-0.3506	-0.2765	-0.2729	-0.4461	-0.4149	-0.2403	-0.2824	-0.2172	-0.0829	0.4798	0.3474	0.5703	0.62	0.1399	0.2451	0.2451	0.0287	0.314	0.243	-0.027	-0.253	-0.2966	-0.203	-0.0311	-0.0658	-0.0427	-0.1817	0.1015	-0.0113	-0.3893	-0.1771	-0.405
H4K12R	-0.6332	-0.4988	-0.5054	-0.6074	-0.5242	-0.3117	-0.4806	-0.3248	-0.0592	-0.3551	-0.4313	-0.2554	-0.4044	-0.585	-0.2475	-0.2224	-0.2446	-0.2423	-0.1657	-0.4868	-0.6131	-0.4053	-0.2454	-0.473	-0.3538	-0.2411	0.2695	0.2632	0.2925	0.4986	0.0547	-0.082	0.0874	-0.1215	0.338	0.4051	-0.0755	-0.1664	-0.3423	-0.2811	0.0111	-0.0177	-0.0536	-0.2231	0.0394	-0.0421	-0.4347	-0.1415	-0.3367
YDR295C/HDA2	-0.6806	-0.6701	-0.6267	-0.6674	-0.6631	-0.5292	-0.5722	-0.2191	-0.2645	-0.3012	-0.3541	-0.377	-0.4523	-0.5107	-0.2796	-0.3684	-0.3285	-0.2155	-0.1058	-0.5348	-0.5382	-0.562	-0.3553	-0.4127	-0.3109	-0.2866	0.1684	0.1714	0.2023	0.3689	-0.0011	-0.2132	-0.0228	-0.2757	0.0286	-0.0159	0.03	-0.0525	-0.1472	-0.1139	0.0688	0.1354	0.0157	-0.1524	0.1613	0.0894	-0.3064	-0.0736	-0.1308
YNL021W/HDA1	-0.7118	-0.6726	-0.6477	-0.6909	-0.6874	-0.5208	-0.6007	-0.2162	-0.2615	-0.3035	-0.3671	-0.3658	-0.4513	-0.5142	-0.2641	-0.3788	-0.3426	-0.2116	-0.1044	-0.5421	-0.5379	-0.5657	-0.3524	-0.4309	-0.3071	-0.295	0.1941	0.184	0.2372	0.3989	0.0076	-0.1874	0.0222	-0.2537	0.0568	0.0067	0.0141	-0.077	-0.1795	-0.1082	0.0616	0.115	0.012	-0.1965	0.1574	0.0804	-0.3302	-0.0909	-0.1633
YPR179C/HDA3	-0.6758	-0.6709	-0.6601	-0.6933	-0.7508	-0.5844	-0.5514	-0.2411	-0.2738	-0.2289	-0.3533	-0.3757	-0.4436	-0.4113	-0.2283	-0.3517	-0.3794	-0.2389	-0.1398	-0.5061	-0.4985	-0.5811	-0.3227	-0.3944	-0.263	-0.2813	0.1472	0.1081	0.1515	0.3038	-0.074	-0.2443	-0.0535	-0.2951	-0.0314	-0.1276	-0.0128	-0.0429	-0.1236	-0.0951	-0.058	0.0771	0.1126	-0.0673	0.1578	0.1421	-0.226	0.0267	-0.0516
YPR023C/EAF3	-0.59	-0.5485	-0.5283	-0.619	-0.5607	-0.4312	-0.4957	-0.2843	-0.186	-0.3034	-0.4635	-0.4276	-0.5499	-0.4052	-0.2693	-0.2175	-0.2441	-0.1725	0.0029	-0.4217	-0.4577	-0.3379	-0.1909	-0.2308	-0.1136	-0.2204	0.0938	0.0164	0.06	0.2693	-0.1808	-0.245	-0.0847	-0.2361	0.2404	0.1995	-0.0861	0.0098	-0.2436	-0.2677	-0.0305	-0.0513	-0.0314	-0.2761	0.1491	0.0944	-0.1863	0.0316	-0.0174
YGL252C/RTG2	-0.6238	-0.5855	-0.5174	-0.6244	-0.5277	-0.3896	-0.5004	-0.2076	-0.2236	-0.3191	-0.3169	-0.3702	-0.4056	-0.4133	-0.2402	-0.2216	-0.3205	-0.4172	-0.2977	-0.3802	-0.3742	-0.4829	-0.2258	-0.3532	-0.2287	-0.2361	0.1859	0.2208	0.1816	0.3727	-0.0289	-0.083	0.0375	-0.1051	0.1947	0.2279	-0.0061	-0.1234	-0.2056	-0.1146	0.0443	0.0535	0.1148	-0.1134	0.1639	0.1274	-0.2071	-0.0527	-0.1939
YIL038C/NOT3	-0.6138	-0.5913	-0.6353	-0.6441	-0.6599	-0.4299	-0.5307	-0.2106	-0.182	-0.2575	-0.3361	-0.3489	-0.4473	-0.4149	-0.2484	-0.2141	-0.4097	-0.3841	-0.1765	-0.3863	-0.3632	-0.4586	-0.254	-0.2261	-0.093	-0.1298	0.1709	0.1811	0.2084	0.4789	-0.1013	-0.0156	0.1655	-0.1942	0.1854	0.0977	-0.1468	-0.0658	-0.2592	-0.1501	-0.0741	-0.1173	0.1466	-0.1885	0.1991	0.1504	-0.3022	-0.1124	-0.1739
YGR270W/YTA7	-0.6047	-0.5421	-0.5422	-0.665	-0.6514	-0.5265	-0.5561	-0.4788	-0.2298	-0.3403	-0.4522	-0.4123	-0.3754	-0.3258	-0.1771	-0.3892	-0.3269	-0.4301	-0.2203	-0.5758	-0.5897	-0.5735	-0.3512	-0.3684	-0.2385	-0.269	0.0891	0.1892	0.1116	0.4059	-0.1206	-0.2258	-0.0907	-0.1958	0.1447	0.0843	-0.1736	-0.0346	-0.2284	-0.1132	-0.1637	-0.024	0.0538	-0.1251	0.2907	0.1317	-0.1535	0.1599	0.0636
YGR056W/RSC1	-0.384	-0.3705	-0.3797	-0.4411	-0.5313	-0.409	-0.3717	-0.4876	-0.2586	-0.2278	-0.2317	-0.376	-0.2351	-0.2822	-0.1062	-0.3375	-0.1951	-0.3426	-0.2115	-0.4728	-0.4773	-0.5663	-0.286	-0.3301	-0.284	-0.211	0.1523	0.1385	0.1026	0.2064	-0.041	-0.1443	-0.0873	-0.1334	0.0343	0.0157	-0.1267	-0.0987	-0.1731	0.0097	-0.2167	-0.1175	0.1196	-0.0505	0.2574	0.1299	-0.1706	0.0981	0.0596
YPL086C/ELP3	-0.3547	-0.3618	-0.4059	-0.4442	-0.4737	-0.3632	-0.2515	-0.3564	-0.3582	-0.1791	-0.2941	-0.3019	-0.1912	-0.2213	-0.0735	-0.3354	-0.3537	-0.2525	-0.3105	-0.2868	-0.3379	-0.4733	-0.3028	-0.2579	-0.2948	-0.1112	0.2902	0.204	0.1767	0.1137	0.0616	0.0275	-0.0594	-0.0238	0.0235	-0.1694	-0.0615	-0.1093	-0.0837	0.0272	-0.2824	-0.2005	0.189	0.0685	0.0584	0.0909	-0.0808	0.0562	-0.1148
YLL002W/RTT109	-0.2236	-0.201	-0.1806	-0.2373	-0.2579	-0.1947	-0.2088	-0.434	-0.1978	-0.2663	-0.202	-0.293	-0.0611	-0.2675	0.0419	-0.2935	0.0235	-0.0204	-0.0202	-0.521	-0.5224	-0.3369	-0.4887	-0.4358	-0.3022	-0.0677	0.1362	0.2012	0.1681	0.1853	0.1403	-0.0772	-0.1478	-0.2036	0.0593	0.0331	-0.1981	-0.2509	-0.2299	-0.0885	-0.0893	-0.0237	-0.1112	-0.1615	0.0991	-0.149	-0.2962	-0.1161	-0.0356
YOR304W/ISW2	-0.3531	-0.3686	-0.3952	-0.42	-0.4322	-0.3006	-0.1794	-0.1117	-0.1049	-0.0375	-0.0533	-0.2269	-0.2433	-0.1615	-0.0576	-0.1417	-0.2864	-0.2206	-0.2763	-0.2003	-0.1366	-0.291	-0.1837	-0.2742	-0.1406	0.0195	0.0846	0.1844	0.161	0.2257	-0.0263	0.0189	-0.0764	-0.2293	-0.0002	-0.0804	0.0515	-0.1458	-0.1609	-0.0729	-0.1195	0.0791	0.2205	0.0961	0.01	0.0326	-0.1646	-0.1431	-0.207
YAL011W/SWC3	-0.5065	-0.4205	-0.3581	-0.443	-0.3305	-0.1181	-0.4373	-0.0845	0.05	-0.2484	-0.3116	-0.131	-0.3113	-0.4526	-0.1851	-0.1163	-0.106	-0.2636	0.0052	-0.4179	-0.4321	-0.3298	-0.2099	-0.2588	-0.167	-0.2657	0.0766	0.2316	0.2215	0.535	0.018	-0.0809	0.153	-0.0709	0.2788	0.4149	-0.115	-0.066	-0.2763	-0.2338	0.1644	0.1674	-0.1954	-0.3266	0.0165	-0.1133	-0.3838	-0.1549	-0.2202
YAR002W/NUP60	-0.4802	-0.4464	-0.3454	-0.4167	-0.393	-0.2526	-0.434	-0.1066	0.009	-0.1673	-0.2547	-0.1016	-0.2053	-0.4643	-0.1963	-0.1849	-0.1463	-0.2004	-0.0638	-0.3671	-0.4681	-0.3944	-0.1106	-0.4219	-0.3792	-0.3239	0.133	0.162	0.2115	0.347	0.0655	-0.2257	-0.0547	-0.1215	0.0105	0.1833	0.0471	0.0712	-0.0416	-0.1287	0.1157	0.2084	-0.0972	-0.1505	0.0513	-0.0689	-0.2785	-0.0359	-0.2339
YDR310C/SUM1	-0.3479	-0.3695	-0.2327	-0.301	-0.2668	-0.0198	-0.2232	0.0393	0.0661	-0.0563	-0.1784	-0.0821	-0.1563	-0.3293	-0.0024	-0.073	-0.0306	-0.0821	0.0379	-0.233	-0.2586	-0.2229	-0.0582	-0.3439	-0.2274	-0.1725	0.1077	0.0857	0.1038	0.2333	-0.0037	-0.1654	0.008	-0.1761	0.0265	0.3152	-0.092	-0.1661	-0.0553	-0.1298	0.0987	0.1262	-0.0797	-0.1224	-0.0244	-0.0958	-0.3486	-0.2536	-0.2903
YDR334W/SWR1	-0.2434	-0.2193	-0.2361	-0.2526	-0.2584	-0.0181	-0.1306	-0.1277	0.231	-0.0954	-0.1179	-0.0904	-0.2085	-0.2482	-0.0115	0.1388	-0.0503	-0.2026	-0.01	-0.1777	-0.2375	-0.1554	-0.0472	-0.0756	0.0034	-0.0144	0.0303	-0.0022	0.1163	0.375	-0.0673	-0.0479	0.213	-0.1354	0.2086	0.316	-0.2234	-0.1866	-0.3483	-0.3043	-0.0642	0.1287	-0.1353	-0.1618	-0.0306	-0.1086	-0.3217	-0.1644	-0.1378
YOL012C/HTZ1	-0.28	-0.2364	-0.1798	-0.2753	-0.2275	0.0084	-0.1919	-0.1518	0.2294	-0.0876	-0.1989	-0.0413	-0.1837	-0.2778	0.0368	0.0375	0.0334	-0.1684	-0.0068	-0.3298	-0.3341	-0.2306	-0.1084	-0.2943	-0.1704	-0.1494	-0.0197	0.0966	0.085	0.3541	-0.0962	-0.1627	0.0641	-0.124	0.2008	0.3812	-0.2527	-0.1581	-0.2733	-0.22	0.0215	0.1462	-0.1611	-0.2808	-0.0867	-0.2005	-0.3596	-0.142	-0.2095
YBR245C/ISW1	-0.2768	-0.2483	-0.2395	-0.3431	-0.444	-0.2033	-0.2698	-0.1927	-0.0877	-0.0061	-0.1948	-0.1751	-0.3196	-0.0304	0.0599	0.0025	0.0363	-0.0932	0.182	-0.3506	-0.2077	-0.2094	-0.1217	-0.1534	-0.0189	-0.143	-0.1449	-0.1093	-0.0508	0.1139	-0.3199	-0.2533	-0.1715	-0.1845	0.0258	-0.0084	-0.2341	0.0342	-0.2439	-0.2118	-0.2519	0.0708	0.0347	-0.0784	0.0202	-0.0064	-0.0943	0.0749	0.1861
YNL330C/RPD3	-0.4742	-0.437	-0.3553	-0.4418	-0.4469	-0.3497	-0.4463	-0.0917	-0.0608	-0.0078	-0.2767	-0.2057	-0.3063	-0.2094	-0.0797	-0.3309	-0.213	-0.0973	0.0073	-0.3757	-0.3036	-0.3159	-0.0859	-0.3559	-0.2636	-0.2933	-0.0661	0.1022	-0.0186	0.1365	-0.2049	-0.342	-0.2669	-0.2194	-0.0244	-0.0001	0.151	0.1935	0.073	-0.0438	-0.0395	0.087	0.0919	-0.1608	0.1642	0.1505	-0.1278	0.095	0.0694
YJL168C/SET2	-0.3662	-0.332	-0.3219	-0.3223	-0.3756	-0.2921	-0.2563	-0.1609	0.0374	-0.0603	-0.242	-0.3169	-0.418	-0.3003	-0.1866	-0.051	-0.0724	0.0592	0.1522	-0.408	-0.3605	-0.226	-0.1118	-0.2168	-0.087	-0.2073	-0.0363	-0.1313	-0.1178	-0.0293	-0.1901	-0.3165	-0.1496	-0.3828	0.0402	0.0628	0.0099	0.0859	-0.0562	-0.2174	0.0359	0.0174	0.0476	-0.2043	0.0225	0.0889	-0.1706	0.0152	0.0303
YLR095C/IOC2	-0.2261	-0.2142	-0.1518	-0.1675	-0.1274	-0.0221	-0.1564	-0.1398	-0.002	-0.1851	-0.102	-0.096	-0.0358	-0.2768	0.0114	-0.0592	0.0995	0.0819	0.117	-0.4389	-0.3613	-0.2642	-0.2306	-0.2909	-0.1755	-0.1663	-0.0458	0.1175	-0.0352	0.13	0.0448	-0.1704	-0.1429	-0.2522	0.0378	0.1516	-0.0473	-0.0595	-0.0767	-0.1016	0.1729	0.0834	-0.0761	-0.2101	0.0795	-0.1068	-0.2589	-0.1251	-0.1169
YML102W/CAC2	-0.2116	-0.2462	0.0004	-0.0681	-0.0977	0.1928	-0.2188	0.1852	0.12	0.1386	0.0614	0.2068	0.1624	-0.0963	0.3795	-0.141	0.155	0.2006	0.312	-0.3925	-0.1863	-0.1338	-0.1034	-0.4435	-0.3402	-0.4511	-0.1573	0.1171	0.0121	0.1446	0.0696	-0.2778	-0.1144	-0.2481	-0.2873	-0.0281	-0.007	0.0046	0.1173	-0.0733	0.194	0.3254	-0.2756	-0.2097	-0.2062	-0.3038	-0.3342	-0.2131	-0.0796
YNL206C/RTT106	-0.1969	-0.2263	-0.0462	-0.1101	-0.2052	0.1274	-0.1717	0.1926	0.263	0.3013	0.1	0.2188	0.0664	-0.1109	0.2542	0.022	0.1284	0.1581	0.3116	-0.2635	-0.1494	-0.1308	-0.0622	-0.4249	-0.2759	-0.3141	-0.0814	0.0243	0.0865	0.142	-0.0083	-0.2302	-0.0183	-0.2412	-0.1938	-0.1002	-0.1545	-0.0478	0.008	-0.1691	-0.0195	0.2634	-0.1823	-0.214	-0.333	-0.3077	-0.4464	-0.2863	-0.1897
YDL002C/NHP10	-0.2851	-0.242	-0.2027	-0.1873	-0.1905	-0.2724	-0.4145	-0.1874	-0.2485	-0.1777	0.0264	-0.1882	-0.0301	-0.2138	-0.0601	-0.4752	-0.1866	-0.1754	-0.0374	-0.4172	-0.3447	-0.4326	-0.2322	-0.1324	-0.2375	-0.3764	-0.0173	0.2342	0.0496	0.1114	0.2244	-0.2035	-0.0232	-0.0857	-0.0291	0.009	0.1596	0.0447	0.1203	0.1496	0.2136	0.1605	-0.1032	-0.0816	0.3124	0.0937	-0.0311	0.0649	0.237
YFL013C/IES1	-0.4434	-0.3534	-0.2754	-0.3319	-0.243	-0.3113	-0.568	-0.1604	-0.201	-0.2447	-0.1027	-0.11	0.0028	-0.3007	-0.0966	-0.5348	-0.2889	-0.2644	-0.1387	-0.3908	-0.3892	-0.3932	-0.1991	-0.2297	-0.349	-0.4043	0.1354	0.3924	0.2098	0.2816	0.3095	-0.1353	0.0695	0.0901	0.0787	0.098	0.1464	0.0033	0.0587	0.1305	0.2076	0.2196	-0.2117	-0.1813	0.1877	0.0331	-0.0808	0.0024	0.0242
YDL070W/BDF2	-0.5238	-0.4582	-0.4943	-0.6311	-0.5303	-0.4165	-0.4688	-0.3074	-0.1526	-0.2629	-0.3955	-0.2554	-0.3102	-0.3138	-0.2349	-0.2815	-0.419	-0.4932	-0.3006	-0.0823	-0.3332	-0.3443	-0.0674	-0.1714	-0.194	-0.0347	0.3719	0.2468	0.2817	0.4253	-0.016	0.0299	0.1439	0.1895	0.3052	0.191	-0.1173	-0.1068	-0.2946	-0.1546	-0.233	-0.0938	0.0045	-0.0827	0.0752	0.0899	-0.0823	0.0608	-0.1408
YLR449W/FPR4	-0.603	-0.6194	-0.5108	-0.6225	-0.4984	-0.395	-0.5146	-0.006	-0.1019	-0.1953	-0.368	-0.1225	-0.276	-0.4148	-0.2733	-0.3371	-0.4593	-0.4226	-0.2942	-0.0192	-0.2615	-0.2985	0.0219	-0.2983	-0.2255	-0.1204	0.2972	0.2121	0.1938	0.3639	0.0055	-0.0997	0.0861	0.0542	0.0793	0.0996	0.0991	0.0534	0.016	-0.045	0.0209	-0.0243	0.068	-0.1024	0.1625	0.1299	-0.0638	0.0669	-0.268
YER030W/CHZ1	-0.3708	-0.3515	-0.368	-0.4174	-0.3526	-0.3619	-0.3918	-0.1009	-0.1594	-0.2636	-0.2599	-0.1122	-0.1033	-0.2826	-0.1738	-0.2219	-0.4025	-0.311	-0.2361	0.1261	-0.1166	-0.1166	0.055	-0.0919	-0.231	-0.0097	0.4398	0.1722	0.2287	0.1925	0.1562	0.0898	0.0944	0.2292	0.1607	0.0169	0.1334	0.1465	-0.0014	-0.0393	-0.0227	-0.0705	0.0678	-0.0689	0.0997	0.2896	0.0222	0.0289	-0.1957
YPL208W/RKM1	-0.4154	-0.3415	-0.3016	-0.4325	-0.287	-0.2062	-0.4198	0.058	-0.1179	-0.2485	-0.2891	0.01	-0.1352	-0.2897	-0.1849	-0.274	-0.3726	-0.3464	-0.2344	0.1577	-0.1011	-0.0462	0.0304	-0.0468	-0.1078	0.0489	0.3966	0.2905	0.3736	0.4114	0.1593	0.172	0.2223	0.334	0.2784	0.1987	0.1362	-0.0422	-0.0385	-0.0331	-0.0049	-0.0697	-0.1362	-0.118	0.1162	0.0188	-0.0285	-0.0406	-0.2678
YER051W/JHD1	-0.2833	-0.3421	-0.2858	-0.3819	-0.2853	-0.2555	-0.3301	0.1238	-0.1006	-0.0362	-0.3015	-0.0492	-0.185	-0.0622	-0.1483	-0.196	-0.3329	-0.2073	-0.1337	0.1599	0.0719	0.0058	0.1148	0.0373	-0.0019	0.0912	0.1475	0.0799	0.1019	0.1456	-0.104	-0.0023	-0.02	0.197	0.0591	-0.0205	0.0216	0.0034	0.0359	0.084	-0.0882	-0.0818	0.029	-0.0634	0.0523	0.0895	0.1647	0.1253	-0.0516
YJL105W/SET4	-0.32	-0.3048	-0.2261	-0.3033	-0.2397	-0.1971	-0.2819	0.0734	0.0089	0.0332	-0.1395	0.0931	-0.0699	-0.0716	-0.0817	-0.1287	-0.265	-0.3321	-0.1129	0.0349	-0.0759	-0.1415	0.2489	-0.0247	-0.068	-0.2585	-0.0192	0.0264	-0.0968	0.1708	-0.1255	-0.1803	-0.0404	0.0766	-0.0095	0.0594	0.1071	0.2794	0.1812	-0.0364	0.0838	0.0419	0.0799	0.0593	0.1037	0.1312	0.163	0.2925	0.076
YMR176W/ECM5	-0.209	-0.1879	-0.0992	-0.1276	-0.0451	-0.0885	-0.2221	0.2849	0.0039	0.0395	-0.0464	0.0861	-0.0854	-0.0698	-0.1282	-0.1028	-0.1858	-0.1922	-0.0043	0.1759	0.0368	0.0797	0.2708	0.0962	0.0644	-0.1015	0.0845	0.0455	-0.0421	0.1123	0.018	-0.08	0.0798	0.1237	0.0351	0.1105	0.235	0.2581	0.1513	-0.0345	0.1689	0.0886	-0.0488	0.0423	0.1863	0.1768	0.1917	0.103	0.1223
YPL015C/HST2	-0.2486	-0.2992	-0.2358	-0.1888	-0.1706	-0.2057	-0.2156	0.2811	0.0979	0.1746	-0.0043	0.0589	-0.0257	-0.026	-0.1299	-0.1338	-0.2988	-0.169	-0.0116	0.0227	0.0448	-0.0651	0.2049	0.0148	0.007	-0.2394	-0.067	-0.0387	-0.2359	-0.0631	-0.065	-0.1703	-0.0481	-0.1176	-0.2153	-0.1769	0.2178	0.271	0.3238	0.1095	0.2327	0.09	0.2562	0.1157	0.1474	0.2768	0.2473	0.227	0.1299
YFR013W/IOC3	-0.1381	-0.1604	-0.1971	-0.3017	-0.337	-0.0969	-0.1488	-0.0414	-0.0033	0.0617	-0.1993	-0.0329	-0.1799	0.1139	0.1025	0.106	-0.1015	-0.1726	0.0563	0.0902	0.0522	-0.0072	-0.0166	-0.0117	0.1146	0.0743	0.0018	-0.1058	0.0639	0.2397	-0.2975	0.0397	0.1234	0.0778	0.1101	-0.0841	-0.3676	-0.0442	-0.3028	-0.1462	-0.3431	-0.0522	0.0522	-0.1106	-0.1433	0.0199	-0.1174	0.0069	0.0528
YJR119C/JHD2	-0.3187	-0.41	-0.373	-0.3709	-0.4314	-0.3294	-0.1754	0.0458	-0.0318	0.1388	-0.1621	-0.0581	-0.2192	0.0467	-0.1453	-0.0318	-0.2803	-0.1999	-0.0244	-0.006	-0.0139	-0.1482	0.125	-0.0271	0.1257	-0.1162	-0.0632	-0.1968	-0.2103	0.0179	-0.2429	-0.2308	-0.116	-0.2521	-0.2458	-0.1912	-0.0438	0.129	0.0902	-0.0365	-0.1069	-0.015	0.2204	0.1773	0.0859	0.1683	0.2322	0.2835	0.1231
YMR069W/NAT4	-0.5385	-0.5866	-0.576	-0.5374	-0.6375	-0.586	-0.4219	-0.1388	-0.2319	0.0219	-0.206	-0.2205	-0.2383	-0.2494	-0.2788	-0.3635	-0.5325	-0.3838	-0.2507	-0.2695	-0.334	-0.489	-0.0594	-0.1436	-0.1216	-0.2835	0.136	0.0437	-0.0432	0.1532	-0.0702	-0.2015	-0.1063	-0.2335	-0.1997	-0.2503	0.1271	0.0966	0.1786	0.0155	-0.1602	-0.1079	0.2924	0.2771	0.2821	0.2283	0.1474	0.3547	0.0949
YPL001W/HAT1	-0.4392	-0.4452	-0.5185	-0.5588	-0.588	-0.4344	-0.327	-0.1467	-0.133	-0.0408	-0.2877	-0.1795	-0.3706	-0.0666	-0.1285	-0.0996	-0.4167	-0.3618	-0.1849	-0.1513	-0.1046	-0.2706	-0.0743	-0.0344	0.0723	-0.0442	0.0018	-0.0403	-0.1159	0.1948	-0.2606	-0.12	-0.0109	-0.104	0.0597	-0.0984	-0.1425	-0.0131	-0.1493	-0.0163	-0.2075	-0.1276	0.3102	0.0609	0.1707	0.26	0.0745	0.2422	0.086
YPR031W/NTO1	-0.4071	-0.3661	-0.4852	-0.5565	-0.615	-0.5096	-0.2917	-0.366	-0.373	-0.167	-0.3553	-0.3344	-0.4339	-0.049	-0.1536	-0.1303	-0.3098	-0.2353	-0.2086	-0.2556	-0.2374	-0.2596	-0.1856	-0.0108	0.1454	0.0966	0.0062	-0.0451	0.0469	0.2042	-0.2311	-0.1123	-0.0815	-0.1668	0.1214	-0.1623	-0.2283	-0.1648	-0.3508	-0.1524	-0.4102	-0.134	0.1278	0.1328	0.1583	0.0806	0.0964	0.214	0.1135
TOP1	-0.0001	0.0789	0.0863	0.0798	0.1665	0.0176	-0.1185	0.0751	0.0132	-0.1348	-0.0299	0.0574	-0.0076	0.0025	-0.0562	0.0031	0.0574	0.0377	0.1355	0.0071	0.0314	0.2013	0.1122	0.1856	0.2552	0.0085	-0.1642	-0.0291	-0.0553	0.084	0.0123	0.0134	0.0808	-0.0364	0.1249	0.088	0.0934	0.1157	0.0276	-0.0759	0.2045	0.0944	-0.2329	-0.1306	0.1663	-0.0157	0.0515	0.0198	0.1721
YML007W/YAP1	0.0174	0.1226	0.1019	0.0713	0.1941	0.0173	-0.1382	-0.0251	0.015	-0.1898	-0.0505	0.1031	0.2046	0.1543	0.195	-0.1981	-0.0752	0.0582	-0.0629	-0.0506	0.0429	0.1515	0.0891	0.0524	0.0039	0.0168	-0.0723	0.029	0.0267	0.0162	0.108	0.0663	-0.0364	0.0948	0.0474	-0.0388	0.111	0.0211	0.169	0.1324	0.1962	0.1927	-0.1839	-0.0862	0.12	-0.0037	0.0943	0.0455	0.1012
YMR044W/IOC4	0.0478	0.0848	-0.0363	0.0792	0.0265	-0.0893	-0.0187	-0.1012	-0.1254	-0.0627	0.2353	-0.1473	-0.0628	-0.0279	-0.0462	0.0411	-0.0312	-0.1149	0.0057	-0.1128	-0.0088	-0.1175	0.0612	0.223	0.19	-0.088	-0.1242	-0.0813	-0.1589	-0.1156	0.0294	-0.0129	-0.0078	-0.1404	-0.0119	-0.0143	0.0758	0.2033	0.0071	-0.0719	0.0894	-0.0285	0.123	0.1303	0.2636	0.3146	0.1985	0.112	0.3608
YDR359C/EAF1	0.1265	0.1592	0.1084	0.086	0.1465	0.0175	-0.0372	0.1213	0.0653	0.0307	-0.0787	0.2189	0.1706	0.2776	0.0176	-0.0067	-0.1089	-0.0592	-0.0939	0.2829	0.215	0.1987	0.2247	0.3087	0.1702	0.1125	-0.0167	0.0881	0.1453	0.0331	0.0143	0.1606	0.0265	0.3796	0.0139	-0.0739	-0.0317	0.0954	0.1874	0.1804	-0.0541	-0.1276	-0.1809	0.0661	-0.0797	-0.0443	0.2991	0.1659	0.0871
YEL066W/HPA3	0.2707	0.2818	0.2902	0.2617	0.2884	0.1312	0.0904	0.2104	0.212	0.1409	0.0561	0.3171	0.2807	0.3831	0.142	0.0787	0.0629	0.0645	0.0113	0.2261	0.2468	0.2787	0.2164	0.2067	0.1715	0.0681	-0.1453	0.0393	0.014	-0.1061	-0.0072	0.0505	-0.1056	0.2592	-0.1073	-0.0983	0.0462	0.1727	0.3317	0.2264	0.0673	-0.0091	-0.1621	0.0644	-0.0655	-0.1334	0.2957	0.1603	0.114
YJL176C/SWI3	0.2855	0.2476	0.3895	0.2645	0.2955	0.2467	0.2199	0.0814	0.1034	0.147	0.068	0.1747	0.2134	0.2811	0.269	0.1133	0.157	0.077	-0.0121	0.1918	0.2163	0.2481	0.2993	0.0369	-0.0107	-0.0599	-0.1598	-0.1458	-0.2272	-0.2117	-0.1319	-0.1513	-0.1965	0.1546	-0.0655	0.0498	0.0669	0.1261	0.1918	0.0535	-0.038	-0.0195	-0.0458	0.0649	-0.0736	-0.0329	0.2476	0.2343	0.151
YPL116W/HOS3	0.1871	0.1001	0.0783	0.1182	0.1048	-0.0175	0.0416	0.0913	-0.0408	0.117	0.0741	0.0418	0.0112	0.2169	0.0564	-0.0099	-0.1168	0.0259	-0.0146	0.236	0.2929	0.1773	0.244	0.153	0.2154	0.1882	-0.1173	-0.1331	-0.1861	-0.1789	-0.1577	0.0044	-0.0922	0.0789	-0.0393	-0.1905	0.1515	0.111	0.1197	0.094	0.0018	-0.1385	0.1813	0.0252	0.1016	0.1307	0.3876	0.1509	0.2421
YPR193C/HPA2	0.1971	0.251	0.098	0.1461	0.0664	0.13	0.1681	0.1055	0.0099	0.2833	0.219	0.2093	0.137	0.4089	0.2297	0.2741	-0.0594	-0.0307	-0.0165	0.2917	0.3568	0.2232	0.2096	0.4519	0.4042	0.0542	-0.1273	-0.1512	-0.1012	-0.0368	-0.1157	0.1624	0.1804	0.1096	0.0367	-0.1509	-0.2081	0.0575	-0.0416	-0.0388	-0.2425	-0.1808	0.1379	0.1569	-0.165	-0.0027	0.1791	0.1847	0.2183
YAL054C/ACS1	0.1714	0.103	0.1269	0.2109	0.2071	0.1192	0.1105	0.2547	0.1586	0.1973	0.2266	0.2917	0.324	0.1546	0.0338	0.0317	-0.0848	-0.005	-0.0455	0.4032	0.284	0.1635	0.2835	0.2152	-0.0109	-0.0148	0.1217	0.0434	0.0385	-0.1285	0.1622	0.153	0.0998	0.2108	-0.1242	-0.136	0.1823	0.1537	0.2807	0.0849	0.0432	0.0005	0.0226	0.1302	-0.0828	0.0731	0.1683	0.0218	-0.0465
YLL046C/RNP1	0.204	0.1576	0.1913	0.303	0.3601	0.2574	0.146	0.3197	0.255	0.1115	0.3387	0.3661	0.3586	0.0366	0.0032	0.0611	-0.0561	-0.0009	0.0479	0.4125	0.285	0.1859	0.4087	0.2693	-0.0697	-0.1219	0.1486	0.0535	0.013	-0.0834	0.2923	0.1284	0.195	0.2409	-0.1134	0.0493	0.3807	0.2331	0.2695	0.0759	0.2908	0.0953	-0.0179	0.0934	-0.0378	0.1352	0.1845	-0.0535	-0.0648
YBR030W/RKM3	-0.0324	-0.0665	0.0372	0.0837	0.1591	0.0586	-0.0754	0.2653	0.1082	0.0149	0.188	0.2113	0.2239	-0.1751	-0.1195	-0.0571	-0.1448	-0.0689	-0.0327	0.2849	0.0811	0.0733	0.3326	0.0102	-0.1598	-0.1542	0.2917	0.1126	0.1656	-0.014	0.371	0.104	0.076	0.1336	-0.092	0.033	0.3756	0.2142	0.2614	-0.0479	0.2501	0.1106	-0.0768	0.0659	0.0217	0.1347	0.0852	-0.0696	-0.1658
YLR357W/RSC2	0.047	-0.0307	0.0943	0.189	0.1901	0.255	0.0854	0.4716	0.2542	0.2492	0.2355	0.3386	0.2073	-0.1733	-0.1515	0.1715	-0.0242	0.0996	0.1037	0.4045	0.2076	0.136	0.3874	0.112	-0.0825	-0.1412	0.1515	-0.0029	0.1647	0.0425	0.1723	0.0594	0.2233	0.1246	-0.1249	0.097	0.2644	0.1625	0.2615	-0.128	0.2251	0.0998	-0.1138	0.0039	-0.267	-0.1237	-0.0316	-0.1193	-0.3021
YBL052C/SAS3	-0.0837	-0.0793	-0.0967	-0.1715	-0.1142	-0.2245	-0.0867	-0.0863	-0.2182	-0.1587	-0.082	-0.0539	-0.0099	0.0076	-0.1746	-0.1506	-0.2222	-0.2239	-0.2193	0.2221	0.0142	-0.0486	0.0804	0.1664	-0.0172	0.0645	0.1934	0.1069	0.1692	0.0514	0.0768	0.0024	-0.0528	0.2573	0.0594	-0.0573	0.2448	0.0149	0.0056	0.0183	-0.1172	-0.0697	-0.0325	0.21	0.1018	0.0868	0.3353	0.1889	0.0264
YDR155C/CPR1	-0.0385	0.0505	-0.0432	-0.1659	-0.0869	-0.0508	-0.0677	-0.0539	-0.096	-0.0589	-0.116	0.0624	0.0188	0.199	0.1543	-0.0077	-0.2097	-0.261	-0.1946	0.3755	0.1712	0.1803	0.0999	0.1756	0.1939	0.2505	0.1942	0.0633	0.1082	0.1797	-0.0305	0.2128	0.2359	0.399	0.315	-0.0014	-0.2634	-0.0656	-0.2039	0.0089	-0.3149	-0.1976	-0.0355	-0.0226	-0.0279	0.0905	0.069	0.0454	0.0423
YMR127C/SAS2	0.0174	0.0574	0.0525	-0.0526	0.0934	0.0468	-0.0699	0.0558	0.057	-0.0839	-0.0402	0.1808	0.2069	0.1117	0.0726	0.0226	-0.197	-0.3135	-0.2576	0.4725	0.2125	0.1978	0.2649	0.1313	-0.0131	0.1183	0.2875	0.1572	0.1761	0.1619	0.1496	0.232	0.2003	0.5059	0.2088	0.112	-0.0121	0.0847	0.0326	0.0516	-0.0803	-0.0434	-0.0687	-0.0159	-0.0284	0.0706	0.2085	0.0448	-0.1017
YDR096W/GIS1	-0.2294	-0.1252	-0.1283	-0.1978	0.0048	-0.0827	-0.2743	0.0217	0.0858	-0.2558	-0.0812	0.0697	0.0881	-0.2294	-0.124	-0.1636	-0.2079	-0.1676	-0.1417	0.1455	-0.0837	-0.0262	0.0168	-0.0669	-0.1795	0.0245	0.3081	0.3192	0.3364	0.2742	0.3428	0.2039	0.2724	0.3273	0.2856	0.1695	0.0987	0.0333	-0.0186	-0.0101	0.2381	0.0718	-0.1767	-0.2265	-0.0019	0.075	-0.1103	-0.1922	-0.297
YPR068C/HOS1	-0.1193	-0.1109	-0.0805	-0.1671	-0.0207	-0.0107	-0.1386	0.0537	-0.0404	-0.1479	-0.1174	0.1441	0.1948	-0.165	-0.0468	-0.1297	-0.1917	-0.1947	-0.1491	0.3232	-0.0382	0.0245	0.0735	-0.0732	-0.1838	0.051	0.3984	0.2533	0.3786	0.2533	0.2665	0.2315	0.1499	0.3875	0.0983	0.0833	0.0347	-0.049	-0.0048	-0.0465	-0.0374	-0.0495	-0.1815	-0.0585	-0.1103	-0.0605	0.0174	-0.0646	-0.2401
YEL056W/HAT2	-0.1106	-0.1728	-0.1459	-0.1489	-0.028	-0.166	-0.1761	0.0563	0.0229	-0.0891	-0.0754	0.0357	0.083	-0.1946	-0.2016	-0.2644	-0.3148	-0.1627	-0.1579	0.204	-0.0239	-0.1192	0.0591	-0.073	-0.3266	-0.018	0.3139	0.2341	0.1687	-0.0188	0.2181	0.0429	-0.0041	0.2443	-0.0828	-0.0375	0.2846	0.2071	0.2929	0.1975	0.1923	-0.0613	0.1083	-0.034	0.0421	0.2077	0.1753	0.0299	-0.239
YKL005C/BYE1	0.0879	0.0024	0.075	0.0913	0.2075	0.0927	0.0055	0.2773	0.193	0.0804	0.0744	0.2515	0.2306	0.0135	-0.0591	-0.0456	-0.1287	-0.0166	-0.0301	0.4092	0.209	0.1305	0.2698	0.0645	-0.17	-0.0316	0.1871	0.1487	0.141	-0.0415	0.1774	0.097	0.0926	0.3185	-0.1316	-0.0329	0.2577	0.2115	0.3155	0.1934	0.1865	0.0203	-0.0194	-0.0173	-0.1944	0.0125	0.1674	-0.0625	-0.2422
UBP8	0.0999	0.0771	0.0778	0.0564	0.0673	0.147	0.1132	0.0155	-0.0896	0.1053	0.0091	0.1182	0.1251	0.1466	0.1165	0.0303	0.0232	0.0451	-0.002	0.0939	0.085	-0.0586	-0.0206	0.035	0.1246	-0.1332	-0.0703	0.0779	0.0487	0.0649	-0.0746	0.084	0.0287	0.1051	0.0392	-0.0247	-0.1406	-0.1885	-0.0344	0.0146	-0.1678	-0.1866	-0.0576	-0.0038	-0.2466	-0.1967	0.0224	0.0484	0.0433
YMR223W/UBP8	0.087	0.0371	0.0532	0.0663	0.0474	0.0894	0.1154	0.0318	-0.0508	0.1432	0.0711	0.1099	0.0629	0.1093	0.0813	-0.0208	-0.0323	0.003	-0.0085	0.1015	0.1074	-0.0706	0.0086	0.0589	0.0715	-0.1095	-0.0293	0.0833	-0.0191	0.0343	-0.099	0.0575	0.071	0.1149	0.0413	-0.0011	-0.0225	-0.1394	-0.0415	0.099	-0.1534	-0.189	0.0882	0.0174	-0.128	-0.0606	0.059	0.0008	0.0428
YOR038C/HIR2	0.0391	-0.0575	0.0263	0.0211	-0.1255	0.016	0.0729	0.1742	0.2487	0.4453	0.1838	0.1334	0.0057	0.0967	0.0578	0.1477	0.068	0.0334	0.2141	0.1382	0.1222	-0.0258	0.1937	-0.0002	0.0302	-0.1283	-0.1784	-0.1747	-0.1977	-0.1129	-0.2174	-0.2891	-0.0703	-0.1646	-0.2343	-0.1761	-0.0515	0.0964	0.06	-0.1199	-0.1757	0.1304	0.0325	0.0587	-0.1248	-0.0503	-0.0033	0.0519	0.1133
YBR279W/PAF1	0.2153	0.2157	0.1687	0.1597	0.0502	-0.0339	0.1735	-0.1526	-0.1021	0.1222	0.0791	0.0679	0.1574	0.2329	0.0355	0.0768	0.0557	-0.0454	-0.0541	0.053	0.0763	-0.0287	-0.0801	-0.0495	0.0305	0.0733	-0.0844	0.0144	-0.0789	-0.1691	-0.0826	0.0129	-0.1128	0.0764	-0.099	-0.2769	-0.1152	0.0633	0.0266	0.0853	-0.2397	-0.2011	0.1769	0.1686	-0.0645	0.0056	0.2068	0.2556	0.1149
YMR263W/SAP30	0.2338	0.2899	0.2566	0.1904	0.1261	0.0699	0.1292	-0.1835	0.033	0.1302	-0.012	0.0977	0.1238	0.2828	0.2107	0.0706	0.185	0.1921	-0.0478	-0.055	0.0023	0.0798	0.0668	-0.0708	0.0138	-0.028	-0.2688	-0.0798	-0.1694	-0.1514	-0.1996	-0.1511	-0.2777	-0.0148	-0.0286	-0.1565	-0.06	0.0927	0.0514	-0.0203	-0.2525	-0.0907	-0.0188	0.0002	-0.0357	-0.0615	0.1215	0.2615	0.2469
YNL097C/PHO23	0.3841	0.4256	0.3752	0.3323	0.2853	0.1533	0.2685	-0.2243	0.0613	0.0593	0.0202	0.1303	0.1807	0.3201	0.2084	0.1419	0.2383	0.2445	-0.0171	0.0043	0.0386	0.1607	0.0925	0.0084	0.0512	0.056	-0.2834	-0.1491	-0.2324	-0.2433	-0.1544	-0.1216	-0.2524	-0.0047	-0.0274	-0.1197	-0.0642	0.0887	0.0352	0.0142	-0.1902	-0.1355	-0.0195	0.0269	-0.0382	-0.0518	0.2019	0.2849	0.2507
YGR252W/GCN5	0.152	0.0741	0.1435	0.0634	-0.0299	0.0178	0.3005	-0.0263	0.0084	0.1779	-0.0403	-0.036	0.0105	0.213	0.1624	0.182	0.1746	0.065	-0.009	-0.095	0.0202	-0.0238	-0.0608	-0.1678	-0.0504	0.025	-0.0976	-0.2668	-0.2945	-0.3574	-0.2587	-0.1291	-0.334	-0.2	-0.2308	-0.219	-0.1109	0.039	0.1069	0.1134	-0.1973	-0.0467	0.374	0.2869	-0.0173	0.0792	0.0381	0.2092	0.0153
YGL194C/HOS2	0.0525	0.0203	0.0129	-0.1043	-0.1464	-0.1226	-0.017	-0.0915	0.0053	0.0733	-0.1812	-0.0103	-0.056	0.2872	0.1999	0.0244	-0.1064	-0.0832	-0.1013	0.0902	0.1625	0.124	0.1764	0.021	0.119	0.1516	-0.1156	-0.1969	-0.2601	-0.144	-0.3613	-0.179	-0.1965	0.0458	-0.0057	-0.1543	-0.1224	0.0313	0.0574	0.0921	-0.2838	-0.1429	0.1494	0.0392	0.104	0.1359	0.2099	0.2838	0.2335
YPL165C/SET6	0.1509	0.163	0.1427	0.0521	0.0535	-0.0361	0.0761	-0.0839	-0.0005	0.1314	-0.0599	0.0375	0.0318	0.4133	0.2621	0.0579	0.0206	0.0159	-0.0946	0.0501	0.1943	0.2231	0.156	0.0571	0.2206	0.0582	-0.2361	-0.1625	-0.3675	-0.2164	-0.2892	-0.1713	-0.2305	-0.0076	0.0067	-0.1538	-0.161	0.03	0.0099	0.1029	-0.203	-0.1245	0.1346	0.0603	0.048	0.0874	0.2885	0.274	0.3361
YPR052C/NHP6A	0.0695	0.0982	0.0255	-0.0438	-0.1066	-0.2423	-0.0403	-0.3011	-0.2176	-0.0238	-0.1905	-0.1109	-0.0015	0.2683	0.018	-0.0903	-0.1693	-0.1991	-0.2143	0.0788	0.0539	0.0605	0.1168	0.1283	0.1132	0.137	-0.017	-0.1283	-0.2103	-0.1246	-0.2077	-0.0488	-0.1736	0.1134	0.0137	-0.2421	-0.0384	0.0995	0.0031	0.0714	-0.3704	-0.2218	0.1571	0.199	0.2412	0.2128	0.39	0.5045	0.3674
YAL019W/FUN30	-0.0888	-0.144	0.0048	-0.0423	0.0675	0.1707	-0.0771	0.2804	0.1968	0.1221	0.0184	0.1932	-0.0442	-0.0371	0.0534	0.1013	0.1047	0.0243	0.1387	0.0228	0.0966	0.0992	0.0309	-0.1098	0.0086	-0.1172	-0.1573	0.0712	-0.0437	0.1834	-0.0362	-0.0834	0.0308	-0.0997	-0.0411	0.1194	-0.0889	0.1032	0.0051	-0.065	0.2216	0.219	-0.189	-0.263	-0.1042	-0.2001	-0.169	-0.1961	-0.159
YOL068C/HST1	0.0184	-0.0735	0.0046	0.0442	0.064	0.2644	0.0595	0.3521	0.2482	0.1938	0.0829	0.1802	-0.0168	-0.0868	0.0653	0.1526	0.0355	0.1571	0.1977	0.122	0.177	0.1051	0.1466	-0.0122	0.0419	0.0292	-0.0394	-0.0487	0.0832	0.0597	-0.0353	0.0222	0.1142	-0.0492	-0.0031	0.2259	-0.027	-0.1709	0.0504	-0.0192	0.1817	0.0666	-0.0736	-0.1191	-0.232	-0.2015	-0.2318	-0.3408	-0.2739
YBR034C/HMT1	-0.1404	-0.1784	-0.0997	-0.0803	0.0525	0.1373	-0.1195	0.291	0.2031	-0.047	-0.0233	0.1821	-0.0459	-0.2762	-0.2012	0.0873	-0.0778	-0.0472	0.1402	0.0973	0.0377	0.0234	0.1455	0.0668	-0.0729	-0.0786	0.0949	0.0543	0.1544	0.201	0.1061	0.0899	0.1123	0.0587	0.0431	0.2191	0.2332	0.1725	0.1154	-0.1166	0.3658	0.1499	-0.0726	-0.1534	-0.0575	-0.0342	-0.0817	-0.1261	-0.3184
YDL088C/ASM4	-0.3025	-0.2859	-0.2606	-0.197	-0.2047	-0.12	-0.2604	0.1544	-0.0813	-0.0543	0.0273	-0.0056	-0.1339	-0.3137	-0.2769	-0.0586	-0.2228	-0.2387	0.0081	0.0082	-0.1099	-0.153	0.1253	0.1561	0.056	-0.2339	0.1591	0.0952	0.113	0.3094	0.126	-0.0003	0.2155	-0.0478	0.0874	0.1596	0.228	0.1145	0.0057	-0.2178	0.1634	-0.0047	-0.0607	0.0686	0.2058	0.1114	-0.0435	-0.0177	0.0047
YDR289C/RTT103	-0.1003	-0.1261	-0.011	-0.0682	-0.1262	-0.0531	-0.1482	0.0157	0.1074	-0.0092	-0.0819	-0.039	0.0295	-0.1397	-0.0451	-0.0826	0.0226	-0.0206	0.1054	-0.0363	-0.1525	-0.0862	-0.02	-0.2005	-0.2409	-0.122	0.1524	0.0551	0.0915	0.0275	0.0942	-0.1516	-0.0852	-0.0466	-0.1034	-0.0003	0.0608	0.1351	0.0546	-0.117	-0.0309	0.1447	-0.0756	-0.0592	0.1391	0.0892	-0.129	-0.0261	-0.0446
YPL127C/HHO1	-0.0649	-0.0921	-0.023	-0.0651	-0.0097	0.0052	-0.1094	0.1101	0.012	0.0155	-0.0294	0.0552	-0.0098	-0.0297	-0.0232	-0.0359	-0.0357	0.0009	0.1169	0.031	0.0527	0.0432	0.0361	0.0016	-0.0189	-0.063	-0.0297	0.0719	0.0042	0.0455	-0.0294	-0.0534	0.0092	0.0377	-0.0155	0.0307	0.0271	0.0822	0.0143	-0.0058	0.0913	0.071	-0.0301	-0.1124	-0.0203	0.0279	0.0109	-0.0207	-0.0283
YDR257C/RKM4	-0.2628	-0.1968	-0.2122	-0.2618	-0.0758	-0.1021	-0.3443	0.0461	-0.1116	-0.2882	-0.236	-0.1328	-0.2299	-0.2129	-0.0875	-0.2367	-0.173	-0.0669	0.0107	-0.1548	-0.0877	0.0804	-0.2212	0.024	0.0148	0.0424	0.0733	0.2397	0.1288	0.3194	0.0823	0.154	0.1323	0.0961	0.3341	0.195	0.0476	-0.108	-0.1939	0.0032	0.2213	0.0379	-0.1529	-0.3289	0.1415	0.0006	-0.1513	-0.2659	-0.0896
YDR440W/DOT1	-0.1453	-0.0752	-0.1305	-0.1458	0.0073	0.1104	-0.1849	0.1084	0.0425	-0.2153	-0.1738	0.0811	-0.0844	-0.2098	-0.1211	0.0328	-0.0918	-0.0568	0.0483	0.185	0.0455	0.1678	-0.0437	0.1372	0.0934	0.1232	0.2497	0.2029	0.393	0.5151	0.1508	0.3611	0.4421	0.2969	0.449	0.3208	-0.1453	-0.2229	-0.3514	-0.1354	0.0019	-0.0618	-0.3645	-0.4135	-0.169	-0.1823	-0.3093	-0.4455	-0.3034
YBR103W/SIF2	-0.0865	-0.0176	-0.0609	-0.074	-0.0182	0.0203	-0.1231	-0.0419	0.2377	-0.2146	-0.1119	-0.1002	-0.1794	-0.2071	-0.0607	0.1777	0.0744	-0.1075	-0.0039	-0.1978	-0.1562	0.0737	-0.0704	-0.1284	0.0475	0.1427	0.0155	0.001	0.0643	0.1705	-0.0107	0.0942	0.1244	-0.1218	0.2117	0.2834	-0.1986	0.0317	-0.1879	-0.1513	0.1712	0.1333	-0.0515	-0.2104	0.1103	0.0306	-0.3202	-0.1997	-0.1371
YCR033W/SNT1	-0.1003	-0.0395	-0.0208	-0.0622	0.0292	0.1185	-0.1686	0.1223	0.2684	-0.1632	-0.1746	-0.0115	-0.2367	-0.1746	-0.0786	0.2089	0.1568	-0.0012	0.1735	-0.2151	-0.0794	0.1688	-0.1129	-0.0918	0.09	0.136	-0.0954	0.0123	0.0902	0.2493	-0.0992	0.0722	0.1303	-0.0744	0.2421	0.3543	-0.1837	0.0176	-0.2118	-0.096	0.2403	0.1886	-0.152	-0.3967	0.0112	-0.0861	-0.3752	-0.3151	-0.1893
YKR029C/SET3	-0.1711	-0.1126	-0.1082	-0.1082	0.0165	0.0764	-0.2045	0.0903	0.2721	-0.2484	-0.176	0.0095	-0.1727	-0.2941	-0.1176	0.1162	0.0197	-0.0673	0.0799	-0.1361	-0.1016	0.1119	-0.0331	-0.1145	-0.0346	0.1049	0.0569	0.074	0.1351	0.2592	0.0281	0.1137	0.1984	0.0073	0.2202	0.3715	-0.0543	0.041	-0.1419	0.0794	0.3076	0.179	-0.1002	-0.3313	0.0748	0.0097	-0.3329	-0.2979	-0.2913
YIL112W/HOS4	-0.3134	-0.2215	-0.196	-0.246	-0.0387	-0.0401	-0.3542	-0.0448	0.0871	-0.3493	-0.1894	-0.1769	-0.2228	-0.4939	-0.2148	-0.1384	-0.0798	-0.1324	-0.0847	-0.3353	-0.3162	-0.1083	-0.2357	-0.2995	-0.2359	-0.0606	0.2072	0.3453	0.2853	0.2953	0.2233	0.1549	0.1417	-0.0237	0.2823	0.4098	0.0109	-0.0497	-0.1441	-0.0778	0.4038	0.1269	-0.1024	-0.3589	0.0792	-0.0153	-0.368	-0.3243	-0.3771
YDL040C/NAT1	0.2824	0.2763	0.1975	0.2621	0.2788	0.2379	0.2707	0.0967	0.0989	0.1078	0.1106	0.1641	0.2319	0.1872	0.1389	0.1189	0.1245	0.2034	-0.0062	0.2624	0.1891	0.2571	-0.0233	0.1289	0.0924	0.2002	0.0587	0.0282	0.13	-0.0855	0.1293	0.2581	0.152	0.1899	0.017	-0.0671	-0.1201	-0.1344	0.0107	0.0986	-0.0527	-0.1098	-0.0495	-0.0329	-0.2148	-0.1426	-0.1126	-0.195	-0.1877
YMR179W/SPT21	0.5591	0.5343	0.3953	0.5118	0.4996	0.3975	0.5191	0.0831	0.0232	0.0847	0.2673	0.124	0.2551	0.3462	0.2425	0.2667	0.2638	0.287	0.0512	0.3902	0.4158	0.4121	-0.0235	0.3418	0.2765	0.4452	-0.0632	-0.0955	0.0267	-0.2526	0.0819	0.3668	0.1602	0.2157	0.0675	-0.0881	-0.1334	-0.162	-0.0661	0.1235	-0.0563	-0.1245	-0.052	0.0321	-0.1855	-0.1696	0.0451	-0.2266	0.02
YDR180W/SCC2	0.5048	0.499	0.3764	0.3834	0.3411	0.2846	0.4263	0.0159	-0.0038	0.1431	0.3052	0.1941	0.345	0.4473	0.3232	0.2318	0.1133	0.0931	-0.0645	0.4844	0.4674	0.3459	0.1335	0.3973	0.1622	0.266	0.0867	-0.0821	0.008	-0.2399	0.106	0.3393	0.0462	0.3203	0.0931	-0.1567	-0.0608	-0.0657	-0.0254	0.0856	-0.2139	-0.1277	0.0499	0.1629	-0.1517	-0.0097	0.1627	-0.0411	0.0782
YDR477W/SNF1	0.571	0.5257	0.564	0.6464	0.6881	0.5184	0.5234	0.2759	0.1644	0.1065	0.3561	0.1688	0.2789	0.2092	0.1332	0.2767	0.508	0.4242	0.1999	0.1779	0.3172	0.4188	-0.0216	0.2007	0.1607	0.2079	-0.1543	-0.0718	-0.0528	-0.298	0.1376	0.1856	-0.0061	0.0239	-0.0428	0.1109	0.0814	-0.0407	0.1148	0.1442	0.3028	0.0494	-0.0961	-0.0293	-0.1627	-0.1715	-0.033	-0.2761	-0.0957
YJL127C/SPT10	0.4515	0.3978	0.3696	0.52	0.4957	0.3697	0.4782	0.2322	0.1627	0.1034	0.3006	0.1409	0.1953	0.1757	0.0585	0.2698	0.3771	0.3811	0.1398	0.1306	0.2266	0.3042	-0.0238	0.2178	0.2117	0.2657	-0.1161	-0.1317	-0.0187	-0.2747	0.1314	0.1766	0.0418	-0.0834	-0.1268	-0.0119	0.041	-0.0654	0.1088	0.1089	0.2318	0.0315	-0.0305	0.0846	-0.0858	-0.1361	-0.0144	-0.2162	-0.0824
YLR399C/BDF1	0.5288	0.4414	0.4194	0.6062	0.5127	0.4167	0.5435	0.2488	0.171	0.2826	0.4324	0.0961	0.1925	0.2946	0.1469	0.2959	0.4289	0.4134	0.2895	0.1197	0.3286	0.2635	-0.0237	0.2498	0.2247	0.1784	-0.2919	-0.2193	-0.2303	-0.3872	-0.0188	0.0693	-0.0015	-0.1718	-0.2292	-0.0944	0.0299	0.0151	0.1482	0.1696	0.1926	0.0316	0.0856	0.0661	-0.1136	-0.0659	0.0081	-0.1852	0.1084
YML062C/MFT1	0.49	0.4499	0.3474	0.5137	0.4671	0.3115	0.5053	0.1046	0.0572	0.1017	0.4059	0.0633	0.2214	0.2436	0.1097	0.2616	0.2829	0.2525	0.0708	0.1785	0.2732	0.2575	-0.0125	0.3289	0.2252	0.2371	-0.0727	-0.1468	-0.0858	-0.3021	0.1536	0.2619	0.0846	-0.026	-0.0514	-0.0755	0.0194	-0.0375	0.0288	0.1185	0.1151	-0.0292	0.0937	0.166	-0.0275	0.0676	0.0434	-0.1981	0.056
YOR244W/ESA1	0.3468	0.2561	0.2011	0.3513	0.2201	0.1513	0.4868	0.0679	0.0304	0.2398	0.3104	0.0229	0.162	0.2712	0.0643	0.1822	0.1986	0.1993	0.0099	0.0753	0.1447	0.046	-0.0534	0.1783	0.181	0.1492	-0.1257	-0.1994	-0.1717	-0.3462	-0.0293	0.0711	-0.0484	-0.1863	-0.2818	-0.2388	-0.0188	0.0083	0.1719	0.165	-0.0099	-0.1212	0.2792	0.3018	-0.0657	0.0364	0.1141	0.0394	0.0633
YDR121W/DPB4	0.3255	0.3286	0.2151	0.2975	0.2822	0.1533	0.2913	-0.1479	0.0178	-0.0318	0.2293	0.0026	0.154	0.1328	0.0954	0.0989	0.1672	0.1511	-0.0307	0.0581	0.0779	0.0804	-0.0864	0.0144	0.0297	0.2141	-0.0689	0.0899	0.1295	-0.0595	0.0882	0.1795	0.001	0.0056	-0.003	-0.067	-0.0544	-0.1035	-0.0919	0.0223	-0.0331	-0.0433	-0.0546	0.0151	-0.1326	-0.1259	-0.0159	-0.1889	0.0116
YOR290C/SNF2	0.2884	0.2637	0.3082	0.3034	0.2805	0.3011	0.3655	0.1146	0.0545	0.0663	0.0521	0.1668	0.1326	0.185	0.2028	0.3269	0.3364	0.2555	0.166	0.0002	0.1684	0.1372	-0.0367	-0.0071	0.0826	0.0912	-0.1512	-0.2317	-0.1277	-0.1493	-0.0945	0.0542	-0.0813	-0.1053	-0.0934	-0.0845	-0.1177	0.0309	0.0327	0.0291	0.0271	0.1167	0.0023	0.0367	-0.1665	-0.1339	-0.0564	-0.0657	-0.055
YER164W/CHD1	0.3211	0.3843	0.4387	0.3906	0.5286	0.4168	0.1719	0.2337	0.2339	0.0447	0.1272	0.3806	0.2236	0.0856	0.0793	0.1723	0.3542	0.323	0.2509	0.1416	0.1464	0.388	0.1351	0.0942	0.0449	0.0006	-0.1707	0.0855	0.0534	0.0559	0.0974	0.098	0.1059	0.2379	0.1793	0.2586	0.0087	0.0894	-0.0308	-0.0094	0.2178	0.0919	-0.3229	-0.2772	-0.2496	-0.23	-0.0498	-0.1579	-0.0617
YER169W/RPH1	0.3399	0.3855	0.4827	0.4462	0.5725	0.4346	0.2104	0.2752	0.1589	0.0551	0.2112	0.2654	0.1883	0.0552	0.0293	0.1755	0.4298	0.3557	0.2675	0.1171	0.1466	0.3842	0.0883	0.0913	0.0583	-0.0322	-0.1524	0.0821	0.0007	-0.0617	0.1255	0.0645	0.0198	0.1409	0.0876	0.2452	0.0989	0.1059	0.0312	0.0018	0.2946	0.0946	-0.264	-0.207	-0.149	-0.2208	-0.0515	-0.1511	-0.0236
YHR206W/SKN7	0.3555	0.3865	0.4401	0.4377	0.5033	0.3777	0.2389	0.2417	0.1368	0.0506	0.194	0.2231	0.2483	0.1967	0.122	0.1589	0.3313	0.2441	0.1493	0.25	0.2581	0.413	0.1906	0.2165	0.1965	0.0736	-0.1552	-0.0465	-0.0304	-0.09	0.0446	0.0694	0.0316	0.0991	0.0159	0.1359	0.0965	0.0957	0.143	0.0268	0.1883	0.0221	-0.2346	-0.0805	-0.0535	-0.1374	0.0959	-0.0972	0.0871
YKL062W/MSN4	0.4431	0.3577	0.4641	0.5266	0.5638	0.5191	0.3946	0.4873	0.3394	0.2809	0.2209	0.3771	0.1959	0.2372	0.0656	0.3595	0.3138	0.3238	0.3057	0.4362	0.455	0.5533	0.4062	0.3079	0.3006	0.1303	-0.2449	-0.2814	-0.1994	-0.1711	-0.1459	0.0122	0.08	0.0426	-0.0897	0.1666	0.1241	0.1236	0.181	0.0298	0.2065	0.0336	-0.1526	-0.0583	-0.2031	-0.1671	0.1303	-0.0358	0.0329
YOR191W/RIS1	0.342	0.2763	0.4324	0.472	0.5173	0.3406	0.2482	0.3768	0.1791	0.2394	0.3017	0.241	0.3203	0.1538	0.1592	0.0565	0.2448	0.2943	0.1797	0.1786	0.2381	0.3369	0.2313	0.0856	-0.0258	-0.1613	-0.1454	-0.0093	-0.2624	-0.3441	0.1052	-0.1171	-0.1685	0.0273	-0.2138	-0.0052	0.3517	0.2258	0.3998	0.0761	0.3578	0.0913	-0.0448	0.0536	-0.0689	-0.0252	0.2385	0.0426	0.1338
YLR113W/HOG1	0.2164	0.1688	0.1687	0.2149	0.2283	0.2363	0.1782	0.2252	0.1468	0.0965	0.0897	0.1342	-0.0133	0.0876	-0.0193	0.3496	0.1988	0.0624	0.1061	0.263	0.2441	0.2291	0.2009	0.12	0.1827	0.1259	-0.1372	-0.1483	-0.0906	-0.0746	-0.1791	0.0217	0.0977	0.0286	-0.0193	0.1378	-0.0487	0.118	0.0019	-0.0471	0.0992	-0.0031	0.0224	-0.0462	-0.0661	-0.0079	0.0053	-0.0906	0.0111
YLR055C/SPT8	0.6127	0.5463	0.629	0.6812	0.5552	0.5342	0.5122	0.2546	0.2402	0.3417	0.3238	0.373	0.393	0.3778	0.2628	0.4126	0.4617	0.4084	0.2531	0.3018	0.4003	0.3823	0.2747	0.2368	0.1044	0.0707	-0.2768	-0.2991	-0.1653	-0.3647	-0.0507	-0.0506	-0.0813	0.0812	-0.2666	-0.0631	-0.0162	0.0799	0.2276	0.0689	-0.0247	0.1007	-0.1702	0.0849	-0.3152	-0.235	0.1339	0.0152	0.0323
YMR037C/MSN2	0.7266	0.6256	0.6671	0.7156	0.673	0.5436	0.6316	0.3164	0.2123	0.3067	0.3445	0.4004	0.4096	0.5149	0.266	0.4464	0.4173	0.371	0.2143	0.5329	0.5527	0.585	0.352	0.4107	0.2954	0.1977	-0.2259	-0.2879	-0.2183	-0.3636	-0.0585	0.0882	-0.0754	0.1676	-0.1658	-0.0788	0.0507	0.1365	0.1982	0.0698	-0.0117	-0.0942	-0.0819	0.1546	-0.2422	-0.1367	0.325	0.0402	0.142
YOR064C/YNG1	0.5102	0.5493	0.4458	0.5398	0.5215	0.3482	0.41	0.1692	0.1356	0.191	0.3566	0.3074	0.3528	0.4005	0.2346	0.1748	0.2129	0.2944	0.208	0.363	0.3928	0.4044	0.2096	0.4441	0.307	0.149	-0.1687	-0.0852	-0.0456	-0.1765	0.1259	0.172	0.1479	0.1972	0.0276	-0.1009	0.0312	0.0083	0.0166	0.0513	0.0179	-0.0425	-0.1966	0.1004	-0.1851	-0.1112	0.248	-0.0292	0.2294
YPL181W/CTI6	0.4177	0.4261	0.4154	0.4674	0.3991	0.2744	0.2836	0.1856	0.188	0.2761	0.1994	0.3701	0.3696	0.4493	0.2473	0.2693	0.2188	0.2227	0.1332	0.2392	0.3781	0.3251	0.284	0.3095	0.2154	0.0723	-0.3084	-0.1842	-0.2111	-0.275	-0.0348	-0.0338	-0.082	0.1544	-0.21	-0.1728	0.0153	0.1558	0.2757	0.1805	-0.0093	0.0845	-0.1121	0.1518	-0.1089	-0.0904	0.3239	0.2363	0.2402
YCR084C/TUP1	-0.041	-0.0443	-0.1716	-0.0701	-0.1787	-0.1739	0.0974	-0.2337	-0.1646	-0.0054	0.0723	-0.2648	-0.0791	-0.0266	-0.0553	-0.1297	-0.0588	-0.0148	-0.1353	-0.2577	-0.1763	-0.2877	-0.353	-0.0558	0.0144	0.0649	0.0441	0.0413	0.0767	-0.0622	0.0693	0.1057	-0.0069	-0.2339	-0.0653	-0.2089	-0.0929	-0.2412	-0.0993	0.1046	-0.1206	-0.1279	0.1927	0.1657	0.0497	0.0121	-0.13	-0.0435	-0.005
YPL129W/TAF14	0.0331	0.0568	-0.074	-0.0264	-0.1119	-0.1189	0.163	-0.2969	-0.2066	0.0091	0.1192	-0.2553	-0.0551	0.0512	0.0696	0.0107	0.005	-0.1244	-0.1689	-0.149	-0.0867	-0.1945	-0.2152	0.0295	0.0589	0.0524	0.0634	-0.0459	-0.1163	-0.1802	-0.0027	0.1137	-0.0449	-0.1578	0.0118	-0.1292	-0.1846	-0.1106	-0.1341	0.0433	-0.2034	-0.1541	0.3107	0.2404	0.1258	0.1708	-0.0637	0.0718	0.1322
YDL042C/SIR2	0.1844	0.1769	0.0611	0.1176	0.0382	0.0714	0.2278	-0.3292	-0.1832	-0.0489	0.0229	-0.1016	0.1838	0.1838	0.2413	0.018	0.0675	0.0989	-0.0398	-0.0912	-0.0573	-0.0879	-0.2598	-0.0374	0.0083	0.0903	0.0181	-0.0258	0.0227	-0.0798	0.0692	0.1479	-0.0711	-0.0416	-0.0423	-0.1954	-0.2488	-0.254	-0.1538	0.0423	-0.2533	-0.1692	0.0133	0.1084	-0.09	-0.1237	-0.0271	0.0133	0.0847
YLR442C/SIR3	-0.0396	-0.0702	-0.1826	-0.1154	-0.206	-0.2349	-0.0214	-0.3517	-0.302	-0.045	-0.0501	-0.3189	-0.1497	0.0632	-0.0096	-0.1856	-0.1881	-0.1085	-0.1657	-0.1855	-0.0973	-0.2636	-0.1613	-0.0134	0.1133	0.0205	-0.0755	-0.0867	-0.111	-0.1084	-0.126	-0.0011	-0.1329	-0.1902	-0.0748	-0.2239	-0.0751	-0.1495	-0.0584	0.0939	-0.1925	-0.2232	0.2106	0.1573	0.1762	0.0766	0.1621	0.2598	0.2965
YGR063C/SPT4	0.105	0.089	0.1369	0.1248	0.0464	0.0196	0.0761	-0.1502	-0.0788	-0.0431	0.0535	-0.1045	0.0986	0.0031	0.0522	-0.1064	0.2043	0.1322	0.0073	-0.252	-0.1585	-0.1014	-0.3236	-0.2529	-0.1329	0.0007	0.0081	0.1493	0.0908	-0.0488	0.1634	0.0198	-0.1728	-0.122	-0.097	-0.1123	-0.0235	-0.1431	-0.0088	0.0393	-0.0183	0.0763	-0.1072	-0.0311	0.0302	-0.2022	-0.1552	-0.1431	-0.02
YDL074C/BRE1	0.0197	0.0529	0.0391	0.0412	-0.0882	0.0465	0.1275	0.0013	0.0737	0.1295	-0.0664	-0.0845	-0.1885	0.0386	0.1403	0.2001	0.2822	0.4503	0.2843	-0.2922	-0.1141	0.0032	-0.1464	-0.2319	-0.0436	-0.0572	-0.2691	-0.3165	-0.239	-0.2714	-0.3063	-0.3102	-0.2643	-0.3664	-0.1481	-0.1016	-0.1732	0.0905	-0.0023	-0.0034	-0.0089	0.064	0.1038	-0.0811	-0.0745	-0.0498	-0.2984	-0.0407	0.0355
YHR119W/SET1	-0.0205	0.0873	0.0173	-0.0021	-0.0718	0.0838	0.0467	-0.1698	-0.0812	-0.0711	-0.1283	-0.1082	-0.1852	-0.0131	0.1383	0.0479	0.2671	0.4169	0.2152	-0.4262	-0.2416	-0.0387	-0.3304	-0.1549	0.0298	-0.1183	-0.2786	-0.1187	-0.0076	0.1215	-0.2034	-0.1066	-0.0545	-0.2587	0.1287	0.0401	-0.331	-0.1874	-0.2995	-0.1413	-0.119	-0.0205	-0.2078	-0.2025	-0.1709	-0.265	-0.4193	-0.1497	0.0375
YLR015W/BRE2	0.1115	0.1917	0.2152	0.2113	0.2208	0.2631	0.17	0.1446	0.0452	0.0381	0.0697	0.0766	-0.016	-0.0286	0.085	0.1429	0.3806	0.5529	0.2577	-0.2201	-0.0745	0.1723	-0.1638	-0.1418	-0.0343	-0.1246	-0.2583	-0.0838	-0.0513	-0.0947	-0.0526	-0.118	-0.0538	-0.2108	-0.0181	0.0801	-0.0982	0.0031	-0.0228	-0.0423	0.203	0.0696	-0.1743	-0.1674	-0.2447	-0.2357	-0.345	-0.1883	-0.147
YHR031C/RRM3	0.0199	0.0432	0.0891	0.1139	0.1396	0.1607	-0.0184	-0.1034	0.0322	-0.2434	0.0307	0.0185	0.144	-0.295	0.0607	-0.1045	0.1707	0.229	0.1078	-0.287	-0.3004	-0.1315	-0.313	-0.3583	-0.3206	-0.0449	0.1211	0.2586	0.2886	0.1428	0.3033	0.0759	-0.0072	-0.0364	0.0428	0.1449	0.045	-0.2	-0.0451	-0.035	0.2106	0.0095	-0.257	-0.2258	-0.0763	-0.3081	-0.3376	-0.3232	-0.2843
[truncated: 142 more columns]
